# 1           **Humans strategically shift decision bias by flexibly** 2           **adjusting sensory evidence accumulation in visual cortex**

3  
4   Niels A. Kloosterman<sup>\*1,2,3,5</sup>, Jan Willem de Gee<sup>2,4</sup>, Markus Werkle-Bergner<sup>5</sup>, Ulman  
5   Lindenberger<sup>1,5</sup>, Douglas D. Garrett<sup>1,5+</sup>, Johannes Jacobus Fahrenfort<sup>2,6+</sup>

6  
7   <sup>1</sup> Max Planck UCL Centre for Computational Psychiatry and Ageing Research, Max Planck Institute for  
8   Human Development, Lentzeallee 94, 14195 Berlin, Germany

9   <sup>2</sup> Department of Psychology, University of Amsterdam, The Netherlands;

10   <sup>3</sup> Center for Brain and Cognition, Institute for Interdisciplinary Studies, University of Amsterdam, The  
11   Netherlands;

12   <sup>4</sup> Department of Neurophysiology and Pathophysiology, University Medical Center Hamburg-  
13   Eppendorf, Germany;

14   <sup>5</sup> Center for Lifespan Psychology, Max Planck Institute for Human Development, Lentzeallee 94, 14195  
15   Berlin, Germany

16   <sup>6</sup> Department of Experimental and Applied Psychology, Vrije Universiteit, van der Boechorststraat 1,  
17   1081 BT Amsterdam, The Netherlands

18   +Shared senior author

19   \*Correspondence: kloosterman@mpib-berlin.mpg.de

## 21   **Lead Contact Information**

22   Niels A. Kloosterman, Ph.D.

23   Max Planck UCL Centre for Computational Psychiatry and Ageing Research,  
24   Lentzeallee 94, 14195, Berlin, Germany

25   Phone: +49 30 82406 424

26   E-mail: kloosterman@mpib-berlin.mpg.de

## 31 **Abstract**

32 Decision bias is traditionally conceptualized as a flexible internal reference against  
33 which sensory evidence is compared. Here, in contrast, we show that experimental  
34 manipulation of decision bias adjusts the rate of evidence accumulation in visual cortex  
35 towards one of the choice alternatives. Participants performed a visual detection task  
36 during EEG recordings. We experimentally manipulated participants' response  
37 criterion using different stimulus-response reward contingencies, inducing liberal and  
38 conservative decision biases in different conditions. Drift diffusion modeling of choice  
39 behavior revealed that an experimentally induced liberal decision bias specifically  
40 biased the rate of sensory evidence accumulation towards 'yes' choices. In visual  
41 cortex, the liberal bias manipulation suppressed prestimulus 8–12 Hz (alpha) power,  
42 which in turn boosted cortical stimulus-related activity in the 59–100 Hz (gamma)  
43 range. Together, these findings show that observers can intentionally control cortical  
44 excitability to strategically bias evidence accumulation towards the decision bound that  
45 maximizes reward within a given ecological context.

46

## 47 **Introduction**

48 Perceptual decisions arise not only from the evaluation of sensory evidence, but are  
49 often biased towards one or the other response alternative by environmental factors,  
50 for example as a result of task instructions and/or stimulus-response reward  
51 contingencies (White & Poldrack, 2014). The ability to willfully control decision bias  
52 enables the behavioral flexibility required to survive in an ever-changing and uncertain  
53 environment. But despite its central and important role in decision making, the neural  
54 mechanisms underlying decision bias are not fully understood.

55 The traditional account of decision bias comes from signal detection theory  
56 (SDT) (Green & Swets, 1966). In SDT, decision bias is quantified by estimating the  
57 relative position of a decision point or 'criterion' in between sensory evidence  
58 distributions for noise and signal (see Figure 1A). In this framework, a more liberal  
59 decision bias arises by moving the criterion closer towards the noise distribution (see  
60 green arrow in Figure 1A). Although SDT has been very successful at quantifying  
61 decision bias, it has not done much to elucidate the mechanism behind it. One reason

62 for this lack of insight may be that SDT does not have a temporal component to track  
63 how decisions are reached over time (Fetsch, Kiani, & Shadlen, 2014).

64 As an alternative to SDT, the drift diffusion model (DDM) conceptualizes  
65 perceptual decision making as the accumulation of noisy sensory evidence over time  
66 into an internal decision variable (Bogacz, Brown, Moehlis, Holmes, & Cohen, 2006;  
67 Gold & Shadlen, 2007; Ratcliff & McKoon, 2008). A decision in this model is made  
68 when the decision variable crosses one of two decision bounds corresponding to the  
69 choice alternatives. Within this framework, a strategic decision bias imposed by the  
70 environment can be modelled in two different ways: either by moving the starting point  
71 of evidence accumulation closer to one of the boundaries (see green arrow in Figure  
72 1B), or by biasing the rate of the evidence accumulation process itself towards one of  
73 the boundaries (see green arrow in Figure 1C). In both the SDT and DDM frameworks,  
74 decision bias shifts have little effect on the sensitivity of the observer when  
75 distinguishing signal from noise; they predominantly affect the relative response ratios  
76 (and in the case of DDM the speed with which one or the other decision bound is  
77 reached). There has been some evidence to suggest that decision bias induced  
78 through shifting the response criterion is best characterized by a drift bias in the DDM  
79 (Urai, de Gee, & Donner, 2018; White & Poldrack, 2014). However, the drift bias  
80 parameter has as yet not been related to a well-described cortical mechanism.

81

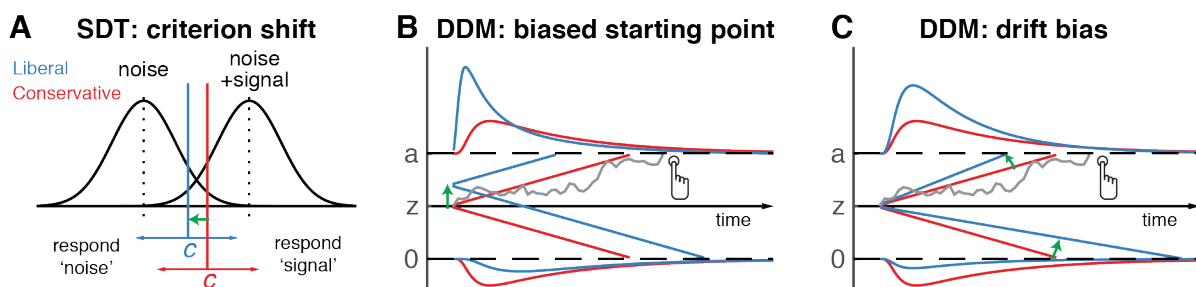

82

83 **Figure 1 | Theoretical accounts of decision bias.** **A.** The SDT account of decision bias. In this  
84 framework, signal and noise+signal distributions are plotted as a function of the strength of internal  
85 sensory evidence. Here, the decision point (or criterion) that determines whether to indicate signal  
86 presence or absence is plotted as a vertical criterion line  $c$ , reflecting the degree of decision bias.  $c$  can  
87 be shifted left- or rightwards to respectively model a more liberal or conservative bias (green arrow  
88 indicates a shift to liberal). In drift diffusion models (DDMs, panels **B.** and **C.**), decisions are modelled  
89 in terms of a dynamic process of sensory evidence accumulation. When sensory input is presented,  
90 evidence starts to accumulate (drift) over time departing from starting point  $Z$ . The rate at which

91 evidence accumulates is called the drift rate, and a response is given when it either crosses decision  
92 boundary  $a$  (signal presence) or decision boundary  $0$  (no signal). DDMs are fitted to distributions of  
93 reaction times obtained over multiple trials. In panels B. and C., reaction time distributions for signal-  
94 present responses are plotted at the top and reaction time distributions for no-signal responses are  
95 plotted in mirror image at the bottom. DDMs can model bias in two different ways. In panel B., bias is  
96 modelled in terms of the DDM starting point  $Z$ , which is moved closer or further away from the decision  
97 bounds  $a$  and  $0$ . In panel C., decision bias is modelled in terms of drift bias, where the rate of evidence  
98 accumulation for signal and noise move upwards or downwards in tandem (green arrows indicate a  
99 shift to liberal). The predicted reaction time distributions under the models in B. and C. are plotted  
100 separately for a liberal and conservative bias above and below the graphs. Panels B. and C. are  
101 modified and reproduced with permission from Urai, de Gee, & Donner (2018).

102

103 Likewise, there have been a number of reports about a correlational  
104 relationship between cortical activity and decision bias. For example, spontaneous  
105 trial-to-trial variations in prestimulus oscillatory activity in the 8–12 Hz (alpha) band  
106 have been shown to correlate with decision bias and confidence (Iemi, Chaumon,  
107 Crouzet, & Busch, 2017; Limbach & Corballis, 2016; Samaha, Iemi, & Postle, 2017).  
108 Relatedly, alpha oscillations have been proposed to be involved in the gating of task-  
109 relevant sensory information (Jensen & Mazaheri, 2010), possibly encoded in high-  
110 frequency (gamma) oscillations in visual cortex (Ni et al., 2016; Popov, Kastner, &  
111 Jensen, 2017). Although these reports suggest a link between alpha suppression and  
112 decision bias, they do not uncover whether pre-stimulus alpha plays an instrumental  
113 role in decision bias and how exactly this might be achieved. For example, it is  
114 unknown whether an experimentally induced shift in decision bias is implemented in  
115 the brain by willfully adjusting pre-stimulus alpha in sensory areas.

116 Here, we explicitly investigate these potential mechanisms by employing a task  
117 paradigm in which shifts in decision bias were experimentally induced within  
118 participants through instruction and asymmetries in stimulus-response reward  
119 contingencies during a visual detection task. By applying drift diffusion modeling to the  
120 participants' choice behavior, we show that strategically adjusting decision bias  
121 specifically affects the rate of sensory evidence accumulation towards one of the two  
122 decision bounds. Further, we demonstrate that this drift bias is achieved by flexibly up-  
123 and down-regulating prestimulus alpha to control the response gain of stimulus-related  
124 gamma activity in visual cortex. Critically, we also show that gamma activity accurately

125 predicts the strength of the evidence accumulation bias within subjects, providing a  
126 direct link between the proposed mechanism and decision bias. Together, these  
127 findings identify the neural mechanism by which intentional control of cortical  
128 excitability is applied to strategically bias perceptual decisions in order to maximize  
129 reward in a given context.

130

## 131 **Results**

### 132 **Liberal decision bias manipulation shifts sensory evidence accumulation**

133 In three EEG recording sessions, human participants (N = 16) viewed a continuous  
134 stream of horizontal, vertical and diagonal line textures alternating at a rate of 25  
135 textures/second. The participants' task was to detect an orientation-defined square  
136 presented in the center of the screen and report it via a button press (Figure 2A). Trials  
137 consisted of a fixed-order sequence of textures (total sequence duration 1 second)  
138 embedded in the continuous stream. A square appeared in the fifth texture of a trial in  
139 75% of the presentations (target trials), while in 25% a homogenous diagonal texture  
140 appeared in the fifth position (nontarget trials). Although the onset of trials within the  
141 continuous stream of textures was not explicitly cued, the similar distribution of  
142 reaction times in target and nontarget trials suggests that participants employed the  
143 temporal structure of the task even when no target appeared (Figure S1A). Consistent  
144 significant EEG power modulations after trial onset even for non-target trials further  
145 confirm that subjects registered trial onsets even without an explicit cue, plausibly  
146 using the onset of a fixed order texture sequence as an implicit cue (Figure S1B).

147 In alternating nine-minute blocks of trials, we actively biased participants'  
148 perceptual decisions by instructing them either to report as many targets as possible  
149 ("Detect as many targets as possible!"; liberal condition), or to only report high-  
150 certainty targets ("Press only if you are really certain!"; conservative condition).  
151 Participants were free to respond at any time during a block whenever they detected  
152 a target. We provided auditory feedback following missed targets (misses) in the liberal  
153 condition and falsely detected targets (false alarms) in the conservative condition and  
154 applied monetary penalties for these errors (Figure 2A; see Methods for details).

155 Participants reliably adopted the intended criterion shift (see Figure 2B showing  
156 that both the hit rate and the false alarm rate went down in tandem as a consequence  
157 of a more conservative criterion). The difference between hit rate and false alarm rate  
158 was not significant between conservative and liberal ( $p = 0.81$ , right bars in Figure 2B).  
159 However, detection performance (sensitivity) computed using standard SDT  $d'$   
160 (reflecting the distance between the noise and signal distributions in Figure 1A) was  
161 slightly higher during conservative (liberal:  $d' = 2.0$  (s.d. 0.90), versus conservative:  $d'$   
162  $= 2.31$  (s.d. 0.82),  $p = 0.0002$ , two-sided permutation test, 10,000 permutations, see  
163 Figure 2C, left bars)(Green & Swets, 1966). We also computed the standard SDT  
164 criterion measure  $c$  reflecting bias in the decision process (see the blue and red  
165 vertical lines in Figure 1A), which uncovered a strong experimentally induced criterion  
166 shift (liberal:  $c = -0.13$  (s.d. 0.4), versus conservative:  $c = 0.73$  (s.d. 0.36),  $p = 0.0001$ ,  
167 permutation test, see Figure 2C, right bars).

168 Because the SDT framework is static, we decided to further investigate how  
169 bias affected various components of the dynamic decision process by fitting different  
170 drift diffusion models (DDMs) to the behavioral data (Figure 1B, C) (Ratcliff & McKoon,  
171 2008). DDMs postulate that perceptual decisions are reached by accumulating noisy  
172 sensory evidence towards one of two decision boundaries representing the choice  
173 alternatives. Crossing one of these boundaries can either trigger an explicit  
174 behavioural report to indicate the decision (for 'yes' responses in our experiment), or  
175 remain implicit (i.e. without active response, for 'no' decisions in our experiment)  
176 (Ratcliff, Huang-Pollock, & McKoon, 2016). We tested two different DDMs that can  
177 potentially account for decision bias: one in which the starting point of evidence  
178 accumulation moves closer to one of the decision boundaries ('starting point model',  
179 Figure 1B) (Mulder, Wagenmakers, Ratcliff, Boekel, & Forstmann, 2012), and one in  
180 which the evidence accumulation process (called the drift) itself is biased towards one  
181 of the boundaries (de Gee et al., 2017) ('drift bias model', see Figure 1C, referred to  
182 as drift criterion by Rattclif and McKoon (2008)). In the two respective models, we  
183 freed either the drift bias parameter ( $db$ , see Figure 2D) for the two conditions while  
184 keeping starting point ( $z$ ) fixed across conditions (for the drift bias model), or vice versa  
185 (for the starting point model). The drift bias parameter is determined by estimating the  
186 contribution of an evidence-independent constant added to the drift (Figure 2B). These

187 alternative models make different predictions about the shape of the RT distributions  
188 in combination with the response ratios: a shift in starting point produces large  
189 changes in both the leading edge and tail of the distribution, whereas a shift in drift  
190 bias produces large changes only in the tail (Ratcliff & McKoon, 2008; Urai et al.,  
191 2018), also see the RT distributions above and below the evidence accumulation  
192 graphs in Figure 1B and 1C.

193 We fitted both the starting point and drift bias models to each participant's RT  
194 distribution for 'yes' choices and the total number of implicit 'no' choices. In both  
195 models, all of the non-bias related parameters (drift rate  $v$ , boundary separation  $a$  and  
196 non-decision time  $u+w$ , see Figure 2D) were also allowed to vary by condition. We  
197 compared goodness of fit of the models to assess which model best explained the  
198 data. We found that the starting point model provided a worse fit to the data, as  
199 indicated by higher Bayesian Information Criterion (BIC) estimates than for the drift  
200 bias model (Figure 2E, see Methods for details). Specifically, for 14 out of the 16  
201 participants the drift bias model provided better fits than the starting point model, for  
202 ten of which delta BIC was greater than six, indicating strong evidence in favor of the  
203 drift bias model. Finally, we compared these models to a model in which both drift bias  
204 and starting point were fixed across the conditions, while still allowing the non-bias-  
205 related parameters to vary per condition. This model provided the lowest goodness of  
206 fit (delta BIC greater than six for both models for all participants). See Figure S3 for  
207 model fits of the drift bias model for each participant.

208 Given the superior performance of the drift bias model, we further characterized  
209 decision making under the bias manipulation using parameter estimates from this  
210 model. Drift rate, reflecting the participants' ability to discriminate targets and non-  
211 targets, was somewhat higher in the conservative compared to the liberal condition  
212 (liberal:  $v = 2.39$  (s.d. 1.07), versus conservative:  $v = 3.06$  (s.d. 1.16),  $p = 0.0001$ ,  
213 permutation test, Figure 2F, left bars). An almost perfect correlation across  
214 participants between DDM drift rate and SDT  $d'$  provided strong evidence that the drift  
215 rate parameter captures perceptual sensitivity (liberal,  $r = 0.97$ ; conservative,  $r = 0.95$ ,  
216 all  $p$ -values  $< 0.005$ , see Figure S2A).



217           Regarding the DDM bias parameters, the condition-fixed starting point  
218 parameter in the drift bias model was smaller than half the boundary separation (i.e.  
219 closer to the ‘no’ boundary:  $z = 0.24$ ,  $p < 0.0001$ , tested against 0.5), indicating an  
220 overall conservative starting point across conditions (Figure S2D). Strikingly, however,  
221 whereas drift bias was on average not different from zero in the conservative condition  
222 ( $db = -0.04$ ,  $p = 0.90$ ), drift bias was strongly positive in the liberal condition ( $db =$   
223  $2.08$ ,  $p = 0.0001$ ; liberal vs conservative:  $p = 0.0005$ ; Figure 2F, right bars). The overall  
224 conservative starting point combined with a condition-specific neutral drift bias  
225 explained the conservative decision bias (as quantified by SDT criterion) in the  
226 conservative condition (Figure 2C). Likewise, in the liberal condition the overall  
227 conservative starting point combined with a condition-specific positive drift bias  
228 (pushing the drift towards the ‘yes’ boundary) explained the neutral bias observed with  
229 SDT (criterion around zero for liberal, see Figure 2C).

230           Converging with these modelling results, drift bias was strongly anti-correlated  
231 across participants with both SDT criterion (liberal,  $r = -0.83$ ; conservative,  $r = -0.79$ ,  
232 see Figure S2B) and reaction times (liberal,  $r = -0.66$ ; conservative,  $r = -0.76$ , see  
233 Figure S2C). The strong correlations between DDM drift rate and SDT  $d'$  on the one  
234 hand, and DDM drift bias and SDT criterion on the other, provide converging evidence  
235 that the SDT and DDM frameworks captured similar underlying mechanisms, while  
236 the DDM additionally captured the dynamic nature of perceptual decision making by  
237 linking the decision bias manipulation to the evidence accumulation process itself.

238           Finally, the bias manipulation also affected two other parameters in the drift  
239 bias model that were not directly related to sensory evidence accumulation: boundary  
240 separation was slightly but reliably higher during liberal compared to conservative ( $p$   
241  $< 0.0001$ ), and non-decision time (comprising time needed for sensory encoding and  
242 motor response execution) was shorter during liberal ( $p < 0.0001$ )(supplementary  
243 Figure S2D). In conclusion, a drift diffusion model of choice behavior implementing a  
244 bias in sensory evidence accumulation best explained how participants adjusted to  
245 the manipulations of decision bias. In the next sections, we used spectral analysis of  
246 the concurrent EEG recordings to identify a plausible neural mechanism that  
247 implements biased sensory evidence accumulation.





258 administered in alternating nine-minute blocks by penalizing either misses or false alarms, respectively,  
259 using aversive tones and monetary deductions. Depicted square and fixation dot sizes are not to scale.  
260 **B.** Average detection rates (hits and false alarms) during both conditions. **C.** SDT parameters for  
261 sensitivity and criterion. **D.** Schematic and simplified equation of drift diffusion model accounting for  
262 reaction time (RT) distributions for explicit 'yes' and implicit 'no' decisions. Decision bias in this model  
263 can be implemented by either shifting the starting point of the evidence accumulation ( $Z$ ), or by adding  
264 an evidence-independent constant ('drift bias',  $db$ ) to the drift rate. See text and Figure 1 for details.  
265 Notation:  $dy$ , change in decision variable  $y$  per unit time  $dt$ ;  $v \cdot dt$ , mean drift (multiplied with 1 for signal  
266 + noise (target) trials, and -1 for noise-only (non-target) trials);  $db \cdot dt$ , drift bias; and  $cdW$ , Gaussian  
267 white noise (mean = 0, variance =  $c^2 \cdot dt$ ). **E.** The difference in Bayesian Information Criterion (BIC)  
268 goodness of fit estimates for the drift bias and the starting point models, A lower delta BIC value  
269 indicates a better fit, showing superiority of the drift bias model to account for the observed results. **F.**  
270 Estimated model parameters for drift rate and drift bias in the drift bias model. Error bars, SEM across  
271 16 participants. \*\*\* $p < 0.001$ ; n.s., not significant.

272

### 273 **Task-relevant textures induce stimulus-related responses in visual cortex**

274 Sensory evidence accumulation in the visual detection task presumably relies on  
275 stimulus-related signals processed in visual cortex. Such stimulus-related signals are  
276 typically reflected in cortical population activity exhibiting a rhythmic temporal structure  
277 (Buzsáki & Draguhn, 2004). Specifically, bottom-up processing of visual information  
278 has previously been linked to increased high-frequency ( $> 40$  Hz, i.e. gamma)  
279 electrophysiological activity over visual cortex (Bastos et al., 2015; Michalareas et al.,  
280 2016; Popov et al., 2017; van Kerkoerle et al., 2014). Figure 3A shows time-frequency  
281 representations of EEG power modulations over posterior cortex for the low and high  
282 frequency bands, normalized with respect to the prestimulus baseline period.

283 We observed a total of four distinct stimulus-related power modulations after  
284 trial onset: two in the high-frequency range ( $> 36$  Hz, Figure 3A, top panel) and two in  
285 the low frequency range ( $< 36$  Hz, Figure 3A, bottom panel). First, a spatially focal  
286 modulation in a narrow frequency range around 25 Hz reflecting the steady state visual  
287 evoked potential (SSVEP) arising from entrainment by the visual stimulation frequency  
288 of our experimental paradigm (Figure 3B, lower panel). A second modulation from  
289 42–58 Hz (Figure 3B, top panel) comprised the first harmonic of the SSVEP, as can  
290 be seen from their similar topographic distributions (Figure 3B, compare top and lower  
291 panel).

292 Third, we observed a 59–100 Hz gamma power modulation (Figure 3C, top  
293 panel), after carefully controlling for high-frequency EEG artifacts due to small  
294 fixational eye movements (microsaccades) by removing microsaccade-related activity  
295 from the data (Hassler, Trujillo-Barreto, & Gruber, 2011; Hipp & Siegel, 2013; Yuval-  
296 Greenberg, Tomer, Keren, Nelken, & Deouell, 2008), and by suppressing non-neural  
297 EEG activity through scalp current density transformation (Melloni, Schwiedrzik,  
298 Wibral, Rodriguez, & Singer, 2009; Perrin, Pernier, Bertrand, & Echallier, 1989) (see  
299 Methods for details). Importantly, the topography of the observed gamma modulation  
300 was confined to posterior electrodes (electrodes highlighted in Figures 3B and 3C, top  
301 panels), in line with the role of gamma in stimulus-related processing in visual cortex  
302 (Ni et al., 2016). Finally, we observed suppression of low-frequency beta (11–22 Hz)  
303 activity in posterior cortex, which typically occurs in parallel with enhanced stimulus-  
304 related gamma activity (Donner & Siegel, 2011; Kloosterman et al., 2015;  
305 Meindertsma, Kloosterman, Nolte, Engel, & Donner, 2017; Werkle-Bergner et al.,  
306 2014)(Figure 3A and 3C, lower panels). In the next section, we used the topographies  
307 of the high-frequency post-stimulus effects in visual cortex (Figures 3B and 3C, top  
308 panels) to identify a prestimulus neural mechanism that could explain the observed  
309 biased evidence accumulation resulting from the experimental decision bias  
310 manipulation.

311

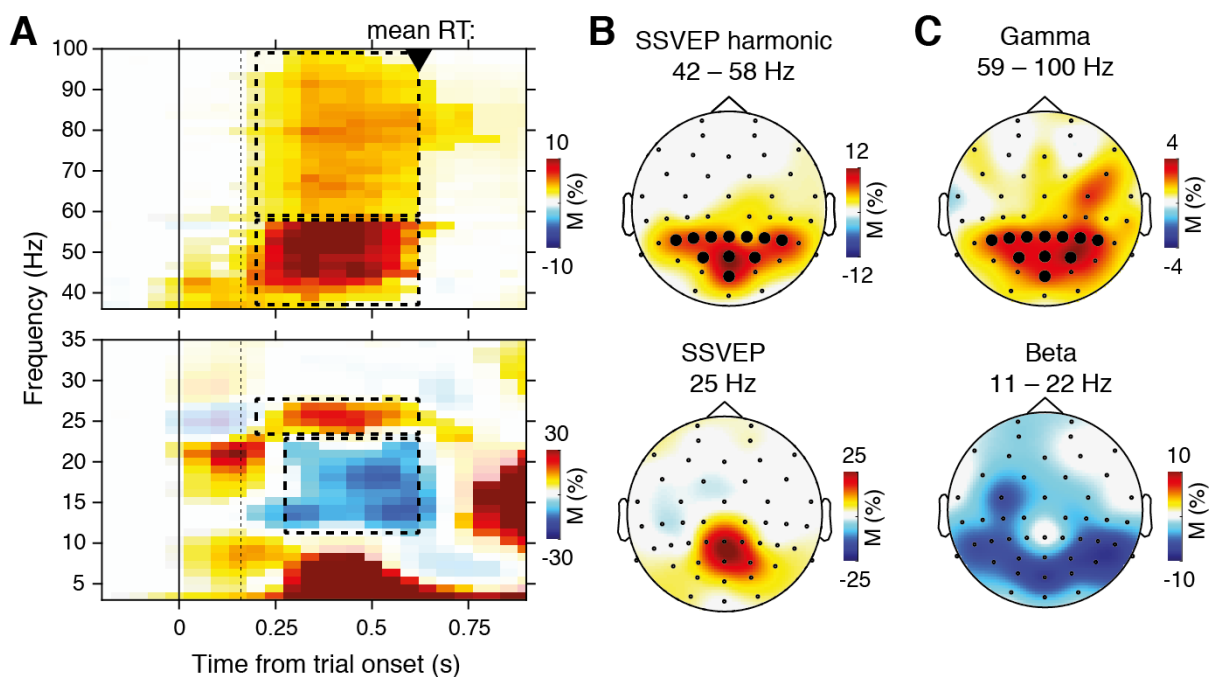

312

313 **Figure 3 | Task-relevant textures induce stimulus-related responses in visual cortex. A.** Time-  
314 frequency representations of high- (top) and low-frequency (bottom) EEG power modulations with  
315 respect to the prestimulus period (-0.4 - 0 s), pooled over the two conditions. Saturated colors indicate  
316 clusters of significant modulation, cluster threshold  $p < 0.05$ , two-sided permutation test across  
317 participants, cluster-corrected;  $N = 15$ ). Solid and dotted vertical lines respectively indicate the onset of  
318 the trial and the target stimulus. M, power modulation. **B.** Scalp maps showing topography of the SSVEP  
319 power modulation around 25 Hz (top) and its harmonic from 42 – 58 Hz (bottom), from 0.2 – 0.6 s after  
320 trial onset. **C.** 59-100 Hz gamma power modulation from 0.2 – 0.6 s (top) and concurrent low frequency  
321 ('beta') power suppression from 11 – 22 Hz; see dashed outlines on time-frequency representations in  
322 A. Thick dots indicate electrodes used for the time-frequency representations in A, and which were  
323 selected for further analysis.

324

### 325 **Adopting a liberal decision bias suppresses prestimulus alpha power**

326 As a first step, we examined prestimulus power between 0.8 and 0.2 s before trial  
327 onset, using the same electrodes that showed the strongest post-stimulus effects  
328 (Figure 4A). This uncovered a highly specific modulation in the alpha range, which we  
329 confirmed to be strongest over the same cortical region that showed strong modulation  
330 in the gamma range (Figure 4B, white dots indicate electrodes showing stimulus-  
331 related gamma modulation). Indeed, when expressing spectral power during the  
332 liberal condition as the percentage signal change from the conservative condition, we  
333 observed a statistically significant cluster of suppressed frequencies precisely in the  
334 8–12 Hz frequency range ( $p < 0.05$ , cluster-corrected for multiple comparisons)  
335 (Figure 4C), which again showed a posterior topography (Figure 4D). This shows that  
336 an experimentally induced liberal decision bias suppresses prestimulus alpha power,  
337 suggesting that alpha modulations are a hallmark of strategic bias adjustment rather  
338 than a mere correlate of spontaneous shifts in decision bias. Importantly, this finding  
339 implies that humans are able to actively control prestimulus alpha power in visual  
340 cortex, plausibly acting to bias sensory evidence accumulation towards the response  
341 alternative that maximizes rewards.

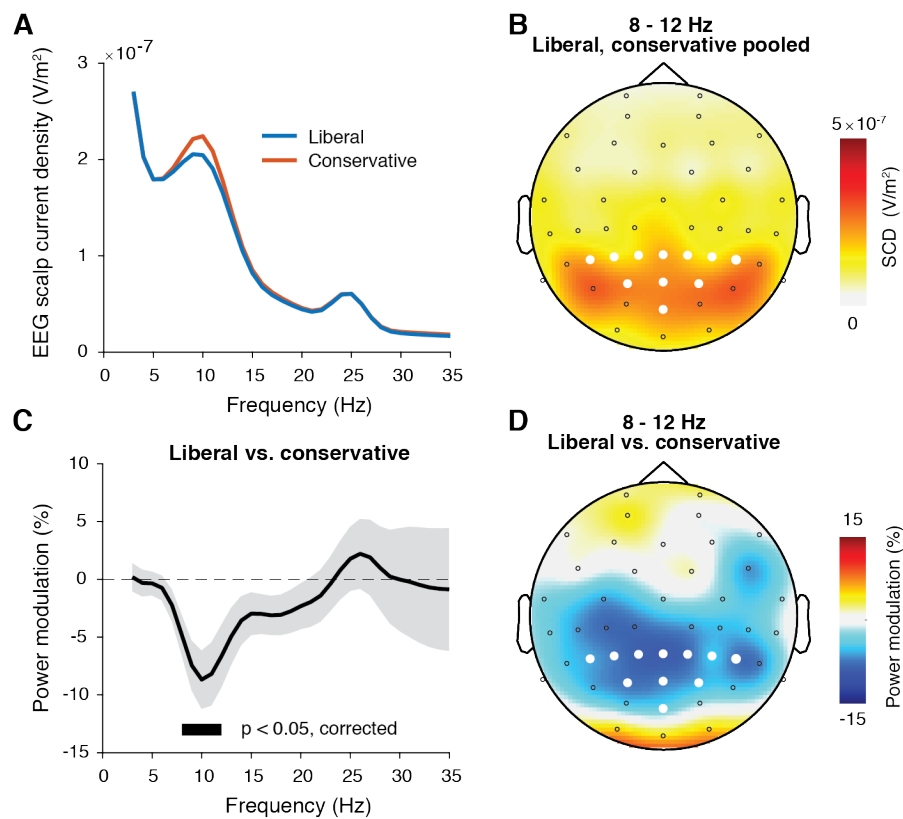

342

343 **Figure 4 | Adopting a liberal decision bias suppresses prestimulus alpha power.** **A.** Low-  
344 frequency power spectra of prestimulus neural activity for both conditions based on the electrodes that  
345 show large post-stimulus power modulations in Figure 3B and C (top panels). **B.** Scalp map of raw  
346 prestimulus EEG alpha power (8–12 Hz neural activity between 0.8 and 0.2 s before sequence onset),  
347 pooled over conditions. White symbols indicate visual cortical electrodes used for the power spectra in  
348 A. and C. **C.** Liberal versus conservative power spectrum. Black horizontal bar indicates statistically  
349 significant frequency range ( $p < 0.05$ , cluster-corrected for multiple comparisons, two-sided). Error bars,  
350 SEM across participants ( $N = 15$ ). **D.** The corresponding scalp map of power modulation in the liberal  
351 condition, expressed as percent signal change from the conservative condition.

352

353

### 354 **Alpha suppression enhances the gain of cortical gamma responses**

355 How could suppression of prestimulus alpha activity bias the process of sensory  
356 evidence accumulation? One possibility is that alpha suppression influences evidence  
357 accumulation by modulating the susceptibility of visual cortex to sensory stimulation,  
358 a phenomenon dubbed ‘neural excitability’ (Iemi et al., 2017; Jensen & Mazaheri,  
359 2010). We explored this possibility using a theoretical framework put forward by  
360 Rajagovindan and Ding (2011). This framework assumes that the relationship  
361 between total synaptic input activity that a neuronal ensemble receives and the total

362 output activity it produces is characterized by a sigmoidal function (Figure 5A); a notion  
363 that is biologically plausible (Destexhe, Rudolph, Fellous, & Sejnowski, 2001;  
364 Freeman, 1979). Within this framework, both sensory input (i.e. as a result of sensory  
365 stimulation) and ongoing fluctuations in endogenous neural activity (i.e. levels of  
366 neural excitability) contribute to the synaptic input into visual cortex. The isolated effect  
367 of sensory input on the total output (i.e. the gain of the output response as caused by  
368 an input stimulus; see marked interval in Figure 5A), can then be expressed as the  
369 first order derivative (the slope) of the sigmoid in Figure 5A. In our experiment,  
370 stimulus-related input activity can be assumed to be more or less constant across trials  
371 since the same stimulus sequence was shown in each trial (see Figure 2A). Thus,  
372 modulations in the stimulus-related output gain generated in visual cortex are largely  
373 determined by the brain's excitability state. This can be seen in Figure 5B, where the  
374 stimulus-related output gain (the first order derivative, or slope from Figure 5A) is  
375 plotted as a function of neural excitability, yielding an inverted-U shaped function.

376 Figure 5B then shows the *effective range* in which the impact of neural  
377 excitability on the stimulus-related output response is largest, while its impact during  
378 low and high excitability is lower. When heightened excitability in the liberal condition  
379 is observed, this framework predicts enhanced output activity in visual cortex when  
380 compared to the conservative condition (Figure 5B), in particular when excitability  
381 differences between conditions occur in its effective range (Rajagovindan & Ding,  
382 2011) (i.e. steeper slope of the solid blue curve compared to the red curve in Figure  
383 5B).

384 We tested this model in our data by following the method put forward by  
385 Rajagovindan and Ding (2011), in which we operationalized neural excitability as pre-  
386 stimulus alpha (Jensen & Mazaheri, 2010), and stimulus-related output gain as post-  
387 stimulus gamma (Ni et al., 2016). We exploited the large number of trials per  
388 participant per condition across the multiple sessions in our study (range 543 to 1391  
389 trials) by sorting each participant's trials into ten excitability bins based on equal-sized  
390 ranges of descending (log-transformed) prestimulus alpha power (indicating  
391 increasing excitability), separately for the conservative and liberal conditions. We  
392 subsequently computed and averaged the (log-transformed) gamma power across the  
393 trials within each excitability bin. Following Rajagovindan and Ding (2011), we



394 removed individual differences in overall gamma power magnitude by subtracting the  
395 lowest binned gamma observation in the conservative condition from all observations.  
396 Finally, we plotted normalized gamma power as a function of excitability, separately  
397 for liberal and conservative (Figure 5C, see Methods for details).

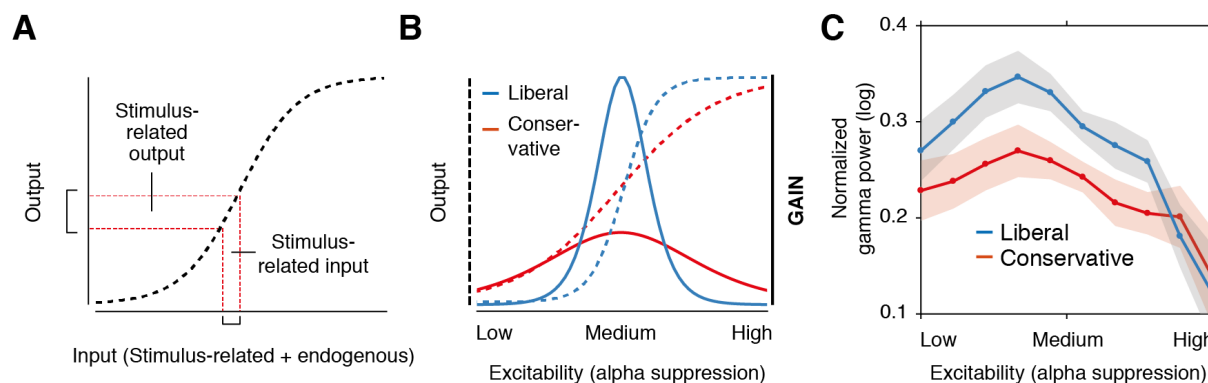

398

399 **Figure 5 | Neural excitability boosts visual cortical responses by enhancing gain.** **A.** Theoretical  
400 response gain model, which describes the transformation of input (both stimulus-related and  
401 endogenous) to the total output activity in visual cortex as a sigmoidal function. **B.** Model predictions.  
402 Stimulus-related output responses (solid lines) are formalized as the first derivative of the sigmoidal  
403 functions (dotted lines), resulting in inverse-U shaped response gain functions. The model predicts that  
404 a liberal decision bias increases the steepness of the sigmoidal function (right) compared to a  
405 conservative bias (left), resulting in stronger stimulus-related responses due to higher gain  
406 (Rajagovindan & Ding, 2011). **C.** Corresponding empirical test. Log-transformed gamma activity  
407 (normalized within participants by subtracting the minimum gamma power during the conservative  
408 condition from all bins) plotted as a function of neural excitability. Error bars, within-subject SEM across  
409 participants (N = 14).

410

411 The resulting plot indeed closely follows an inverted-U shaped relationship  
412 between excitability and stimulus-related gamma activity for both conditions, with  
413 particularly low gamma responses for the highest excitability bins (Figure 5C).  
414 Critically, average gamma power was higher in the liberal than in the conservative  
415 condition, except during the highest excitability bins (Figure 5C, rightmost two data  
416 points). Indeed, the flanks of the inverted-U curve for the liberal condition were steeper  
417 for the liberal condition, suggesting increased response gain. A three-way repeated  
418 measures ANOVA with factors condition (conservative, liberal), brain activity type  
419 (prestimulus alpha, poststimulus gamma) and bin level (1–10) revealed a significant  
420 three-way interaction ( $F(9,117) = 2.96$ ,  $p = 0.003$ , partial  $\eta^2 = 0.19$ , Greenhouse-



421 Geisser corrected  $p = 0.046$ ). Importantly, the marginally significant quadratic contrast  
422 ( $F(1,13) = 3.47$ ,  $p = 0.085$ , partial  $\eta^2 = 0.21$ ) fitted this interaction almost as well as a  
423 linear contrast ( $F(1,13) = 4.69$ ,  $p = 0.049$ , partial  $\eta^2 = 0.265$ ). This three-way quadratic  
424 interaction effect indeed suggests a more steeply U-shaped curve for gamma  
425 responses in the liberal condition, in line with enhanced gain. Taken together, these  
426 findings indicate that increased excitability during the liberal condition boosted input-  
427 related activity, which in turn indiscriminately biased sensory evidence accumulation  
428 towards ‘yes’ responses. In the next section, we confirm a direct link between drift bias  
429 and cortical stimulus response gain as measured through gamma.

430

### 431 **Visual cortical gamma activity predicts strength of evidence accumulation bias**

432 The findings presented so far suggest that behaviorally, a liberal decision bias shifts  
433 evidence accumulation towards ‘yes’ responses (drift bias in the DDM), while neurally  
434 it results in an increase of prestimulus cortical excitability concomitant with post-  
435 stimulus response gain expressed in gamma modulation in visual cortex. In a final  
436 analysis, we asked whether increases in gamma activity are directly related to a  
437 stronger drift bias. We predicted such a direct correspondence during the liberal  
438 condition, in which both drift bias and gamma activity were increased (see Figures 2F  
439 and 5C), but not during the conservative condition, in which drift bias was around zero  
440 and gamma was weaker than during liberal.

441 To test these predictions, we again applied the drift bias DDM to the behavioral  
442 data, but now freed the drift bias parameter not only for the two conditions, but also  
443 for the ten alpha suppression bins used to show the inverted-U-shaped relationship  
444 between excitability and stimulus-related gamma (see Figure 5C). We normalized the  
445 bin-resolved drift bias and gamma scalar values by z-scoring within each participant  
446 to remove individual differences in their ranges and averaged across participants  
447 within each alpha (excitability) bin. Finally, we directly tested the correspondence  
448 between drift bias and gamma using a within-subject group regression. Gamma  
449 activity indeed accurately predicted drift bias in the liberal condition ( $R^2(9) = 0.77$ ,  $p =$   
450  $0.0008$ , Figure 6 left panel). In contrast, drift bias was not well predicted by the  
451 corresponding gamma activity in the conservative condition ( $R^2(9) = 0.0001$ ,  $p = 0.98$ ,

452 Figure 6 right panel), which is perhaps unsurprising given the fact that drift bias was  
453 around zero in the conservative condition (see Figure 2F). Accordingly, predictive  
454 power was significantly greater in the liberal than in the conservative condition ( $R^2_{\text{LIB}}$   
455  $- R^2_{\text{CONS}} = 0.77$ ,  $p = 0.01$ ). The increase in gamma power in liberal versus conservative  
456 also predicted the increase in drift bias across the conditions ( $R^2(9) = 0.56$ ,  $p = 0.0126$ ,  
457 Figure S4), further suggesting that the experimental bias manipulation indeed  
458 enhanced gamma activity across excitability bins. We obtained qualitatively similar  
459 results without averaging across participants, but instead correlating across bins of all  
460 participants together using either ten or five bins per participant, suggesting these  
461 effects were not driven by single participants (data not shown). Taken together, these  
462 results show that enhanced post-stimulus gamma activity during the liberal condition  
463 underlies the evidence accumulation bias reflected in the drift bias parameter of the  
464 drift diffusion model.

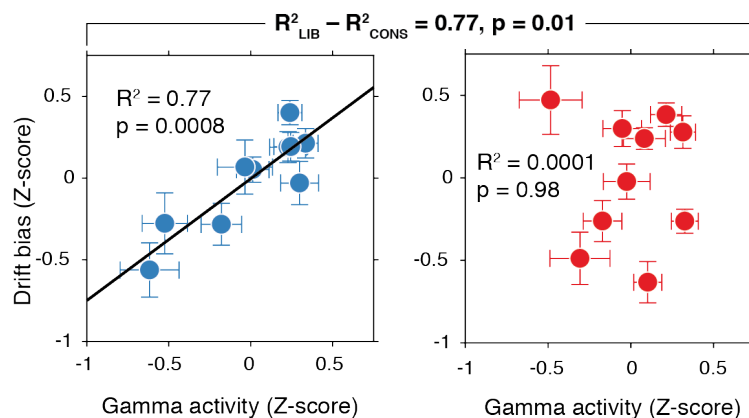

465  
466 **Figure 6 | Visual cortical gamma activity predicts strength of evidence accumulation bias.** Linear  
467 regression of drift bias on gamma activity, separately for the two conditions. Gamma activity accurately  
468 predicts drift bias in the liberal (left), but not the conservative condition (right). Each dot represents an  
469 excitability bin and is obtained after averaging across participants ( $N = 14$ , see Methods for details).  
470 Error bars, SEM across participants.

471

## 472 Discussion

473 Humans possess a remarkable ability to strategically shift decision biases in order to  
474 flexibly adapt to the environment and maximize rewards. Traditionally, bias has been  
475 conceptualized in SDT as a criterion threshold that can be shifted towards or away  
476 from a noise or signal distribution. To date, however, the neural underpinnings of such  
477 bias shifts have remained elusive. Here, in contrast, we use a DDM drift bias model to

478 demonstrate that an experimentally induced bias shift affects the process of sensory  
479 evidence accumulation itself, rather than shifting a threshold entity as SDT implies.  
480 Moreover, we reveal the neural signature of drift bias, by showing that a liberal  
481 decision bias increases alpha suppression (neural excitability) of visual cortex.

482 Although previous studies have shown correlations between suppression of  
483 prestimulus alpha (8–12 Hz) power and a liberal decision bias (Iemi et al., 2017;  
484 Limbach & Corballis, 2016), these studies have not established the effect of  
485 experimentally induced bias shifts. In the current study, by experimentally  
486 manipulating decision bias we show for the first time that prestimulus alpha plays an  
487 instrumental, and not merely a correlational role in decision bias. Further, we show  
488 that alpha suppression in turn boosts stimulus-related gamma activity through  
489 increased cortical response gain. Critically, gamma activity accurately predicted the  
490 strength of the drift bias parameter in the DDM drift bias model. Together, these  
491 findings show for the first time that humans are able to actively implement decision  
492 biases by flexibly adapting neural excitability to strategically shift sensory evidence  
493 accumulation towards one of two decision bounds.

494 Based on our results, we propose that decision biases are implemented by  
495 flexibly adjusting neural excitability in visual cortex. Figure 7 summarizes this  
496 proposed mechanism graphically by visualizing a hypothetical transition in neural  
497 excitability following an experimentally induced liberal decision bias, as reflected in  
498 visual cortical alpha suppression (left panel). This increased excitability translates into  
499 stronger gamma-band responses following stimulus onset (right panel, top). This  
500 increased gamma gain finally biases evidence accumulation towards the ‘yes’ decision  
501 boundary during a liberal state, resulting in more ‘yes’ responses, whereas ‘no’  
502 responses are decimated (blue RT distributions; right panel, bottom). Our  
503 experimental manipulation of decision bias in different blocks of trials suggests that  
504 decision makers are able to control this biased evidence accumulation mechanism  
505 willfully by adjusting excitability, as reflected in alpha.

506

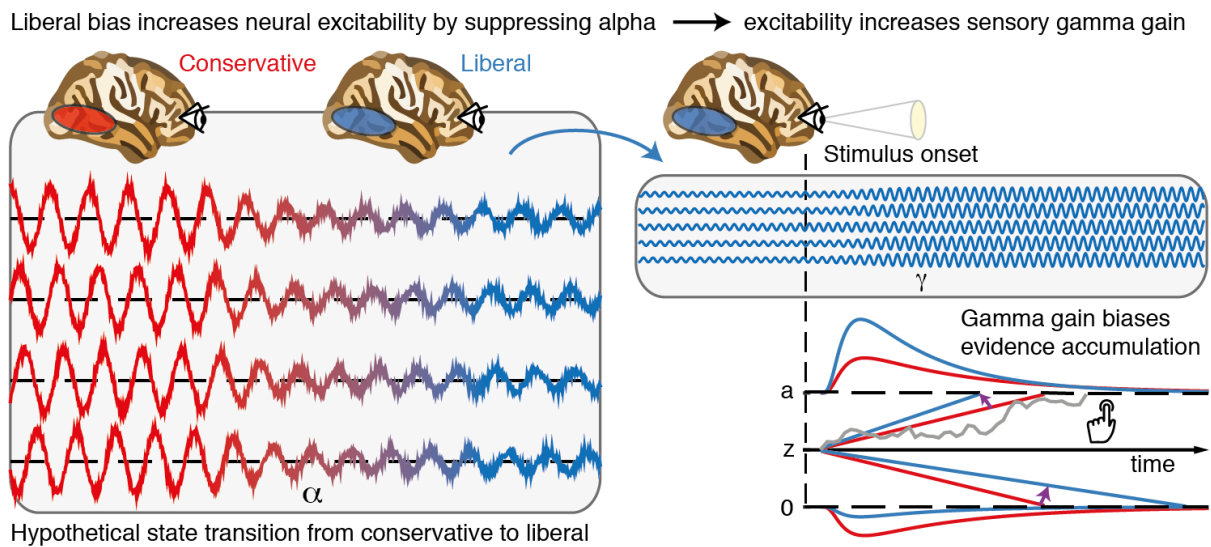

507

508 **Figure 7 | Illustrative graphical depiction of the excitability state transition from conservative to liberal, and subsequent biased evidence accumulation under a liberal bias.**

509 The left panel shows the transition from a conservative to a liberal stimulus block. The experimental induction of a liberal  
510 decision bias causes alpha suppression in visual cortex, which increases neural excitability. The right  
511 top panel shows increased gamma-gain for incoming sensory evidence under conditions of high  
512 excitability. The right bottom panel shows how increased gamma-gain causes a bias in the drift rate,  
513 resulting in more 'target present' responses than in the conservative state.  
514

515

516 A neural mechanism that could underlie bias-related alpha suppression may be  
517 under control of the catecholaminergic neuromodulatory systems, consisting of the  
518 noradrenaline-releasing locus coeruleus (LC) and dopamine systems (Aston-Jones &  
519 Cohen, 2005). These systems are able to modulate the level of arousal and neural  
520 gain, and show tight links with pupil responses (de Gee et al., 2017; de Gee, Knapen,  
521 & Donner, 2014; Joshi, Li, Kalwani, & Gold, 2015; McGinley, David, & McCormick,  
522 2015). Accordingly, prestimulus alpha power suppression has also recently been  
523 linked to pupil dilation (Meindertsma et al., 2017). From this perspective, our results  
524 reconcile previous studies showing relationships between a liberal bias, suppression  
525 of spontaneous alpha power and increased pupil size. Consistent with this, a recent  
526 monkey study observed increased neural activity during a liberal bias in the superior  
527 colliculus (Crapse, Lau, & Basso, 2018), a mid-brain structure tightly interconnected  
528 with the LC (Joshi et al., 2015). Taken together, a more liberal within-person bias  
529 (following experimental instruction) might activate neuromodulatory systems that  
530 subsequently increase cortical excitability and enhance sensory responses for both

531 stimulus and ‘noise’ signals in visual cortex, thereby increasing a person’s propensity  
532 for ‘yes’ responses (Iemi et al., 2017).

533 Rather than a link between alpha activity and decision bias, several previous  
534 studies have reported a link between alpha and task performance, particularly in the  
535 phase of alpha oscillations (Busch, Dubois, & VanRullen, 2009; Mathewson, Gratton,  
536 Fabiani, Beck, & Ro, 2009). Our findings can be reconciled with those by considering  
537 that detection sensitivity in many previous studies was often quantified in terms of raw  
538 stimulus detection rates, which do not dissociate objective sensitivity from response  
539 bias (see Figure 2B) (Green & Swets, 1966). Indeed, our findings are in line with  
540 recently reported links between decision bias and spontaneous fluctuations in  
541 excitability (Iemi et al., 2017; Iemi & Busch, 2017; Limbach & Corballis, 2016),  
542 suggesting an active role of neural excitability in decision bias.

543 Relatedly, a concern regarding our findings could be that the observed change  
544 in cortical excitability reflects a change in detection sensitivity (drift rate) rather than  
545 an intentional bias shift. This is unlikely because that would predict effects opposite to  
546 those we observed. We found increased excitability in the liberal condition compared  
547 to the conservative condition. If this were related to improved detection performance,  
548 one would predict higher sensitivity in the liberal condition, while in fact we found  
549 higher sensitivity in the conservative condition (compare drift rate to drift bias in both  
550 conditions in Fig. 2C). This finding convincingly ties cortical excitability in our paradigm  
551 to a strategically applied bias shift, as opposed to a change in detection sensitivity.  
552 Convergently, other studies also report a link between prestimulus low-frequency EEG  
553 activity and subjective perception, but not objective task performance (Benwell et al.,  
554 2017; Iemi & Busch, 2017).

555 Summarizing, our results show that stimulus-related responses are boosted  
556 during a liberal decision bias due to increased cortical excitability, in line with recent  
557 work linking alpha power suppression to response gain (Peterson & Voytek, 2017).  
558 Future studies can now establish whether this same mechanism is at play in other  
559 subjective aspects of decision-making, such as confidence and meta-cognition  
560 (Fleming, Putten, & Daw, 2018; Samaha et al., 2017) as well as in a dynamically  
561 changing environment (Norton, Fleming, Daw, & Landy, 2017). Explicit manipulation

562 of cortical response gain during a bias manipulation by pharmacological manipulation  
563 of the noradrenergic LC-NE system (Servan-Schreiber, Printz, & Cohen, 1990) or by  
564 enhancing occipital alpha power using transcranial stimulation (Zaehle, Rach, &  
565 Herrmann, 2010) would further establish the underlying mechanisms involved in  
566 decision bias. In the end, although one may be unaware, every decision we make is  
567 influenced by biases that operate on the noisy evidence accumulation process  
568 towards one of the decision bounds. Understanding how these biases affect our  
569 decisions is key to becoming aware of these biases (Pleskac, Cesario, & Johnson,  
570 2017), allowing us to control or invoke them adaptively. Pinpointing the neural  
571 mechanisms underlying bias in an elementary perceptual task (as used here) may  
572 pave the way for understanding how more abstract and high-level decisions are  
573 modulated by decision bias (Tversky & Kahneman, 1974).

574

## 575 **Acknowledgments**

576 This work was supported by the Max Planck Society. In addition, DDG and NAK are  
577 supported by an Emmy Nöther Programme grant from the German Research  
578 Foundation (to DDG) and by the Max Planck UCL Centre for Computational Psychiatry  
579 and Ageing Research. MWB is supported by a grant from the German Research  
580 Foundation (DFG; WE4296/5-1), as well as the Jacobs Foundation via an Early Career  
581 Research Fellowship.

582

## 583 **Author Contributions**

584 NAK and JJF designed research, NAK performed research, NAK, JWdG and JJF  
585 analyzed data, MWB and DDG provided theoretical background, NAK, JJF, UL, MWB,  
586 DDG, JWdG wrote the paper, NAK, JJF, UL, MWB, DDG, JWdG edited and  
587 commented on the manuscript.

588

## 589 **Declaration of Interests**

590 The authors declare no competing interests.



591

## 592 **References**

- 593 Aston-Jones, G., & Cohen, J. D. (2005). An integrative theory of locus coeruleus-  
594 norepinephrine function: adaptive gain and optimal performance. *Annual Review*  
595 *of Neuroscience*, 28(1), 403–450.  
596 <http://doi.org/10.1146/annurev.neuro.28.061604.135709>
- 597 Bastos, A. M., Vezoli, J., Bosman, C. A., Schoffelen, J.-M., Oostenveld, R., Dowdall,  
598 J. R., et al. (2015). Visual Areas Exert Feedforward and Feedback Influences  
599 through Distinct Frequency Channels. *Neuron*, 85(2), 390–401.  
600 <http://doi.org/10.1016/j.neuron.2014.12.018>
- 601 Benwell, C. S. Y., Tagliabue, C. F., Veniero, D., Cecere, R., Savazzi, S., & Thut, G.  
602 (2017). Pre-stimulus EEG power predicts conscious awareness but not objective  
603 visual performance. *eNeuro*, 4(6), ENEURO.0182–17.2017.  
604 <http://doi.org/10.1523/ENEURO.0182-17.2017>
- 605 Bogacz, R., Brown, E., Moehlis, J., Holmes, P., & Cohen, J. D. (2006). The physics  
606 of optimal decision making: A formal analysis of models of performance in two-  
607 alternative forced-choice tasks. *Psychological Review*, 113(4), 700–765.  
608 <http://doi.org/10.1037/0033-295X.113.4.700>
- 609 Busch, N. A., Dubois, J., & VanRullen, R. (2009). The Phase of Ongoing EEG  
610 Oscillations Predicts Visual Perception. *Journal of Neuroscience*, 29(24), 7869–  
611 7876. <http://doi.org/10.1523/JNEUROSCI.0113-09.2009>
- 612 Buzsáki, G., & Draguhn, A. (2004). Neuronal oscillations in cortical networks.  
613 *Science (New York, NY)*, 304(5679), 1926–1929.  
614 <http://doi.org/10.1126/science.1099745>
- 615 Crapse, T. B., Lau, H., & Basso, M. A. (2018). A Role for the Superior Colliculus in  
616 Decision Criteria. *Neuron*, 97(1), 181–194.e6.  
617 <http://doi.org/10.1016/j.neuron.2017.12.006>
- 618 de Gee, J. W., Colizoli, O., Kloosterman, N. A., Knapen, T., Nieuwenhuis, S., &  
619 Donner, T. H. (2017). Dynamic modulation of decision biases by brainstem  
620 arousal systems. *eLife*, 6, 309. <http://doi.org/10.7554/eLife.23232>
- 621 de Gee, J. W., Knapen, T., & Donner, T. H. (2014). Decision-related pupil dilation  
622 reflects upcoming choice and individual bias. *Proceedings of the National*  
623 *Academy of Sciences of the United States of America*, 111(5), E618–25.  
624 <http://doi.org/10.1073/pnas.1317557111>
- 625 Destexhe, A., Rudolph, M., Fellous, J. M., & Sejnowski, T. J. (2001). Fluctuating  
626 synaptic conductances recreate in vivo-like activity in neocortical neurons.  
627 *Neuroscience*, 107(1), 13–24. [http://doi.org/10.1016/S0306-4522\(01\)00344-X](http://doi.org/10.1016/S0306-4522(01)00344-X)
- 628 Donner, T. H., & Siegel, M. (2011). A framework for local cortical oscillation patterns.  
629 *Trends in Cognitive Sciences*, 15(5), 191–199.  
630 <http://doi.org/10.1016/j.tics.2011.03.007>
- 631 Efron, B., & Tibshirani, R. (1998). The problem of regions. *The Annals of Statistics*,  
632 26(5), 1687–1718. <http://doi.org/10.1214/aos/1024691353>
- 633 Fahrenfort, J. J., Scholte, H. S., & Lamme, V. A. F. (2007). Masking disrupts  
634 reentrant processing in human visual cortex. *Journal of Cognitive Neuroscience*,  
635 19(9), 1488–1497.



- 636 [http://doi.org/10.1162/jocn.2007.19.9.1488&url\\_ctx\\_fmt=info:ofi/fmt:kev:mtx:ctx&](http://doi.org/10.1162/jocn.2007.19.9.1488&url_ctx_fmt=info:ofi/fmt:kev:mtx:ctx&ft_val_fmt=info:ofi/fmt:kev:mtx:journal&rft.atitle=Masking)  
637 [ft\\_val\\_fmt=info:ofi/fmt:kev:mtx:journal&rft.atitle=Masking](http://doi.org/10.1162/jocn.2007.19.9.1488&url_ctx_fmt=info:ofi/fmt:kev:mtx:journal&rft.atitle=Masking)
- 638 Fetsch, C. R., Kiani, R., & Shadlen, M. N. (2014). Predicting the Accuracy of a  
639 Decision: A Neural Mechanism of Confidence. *Cold Spring Harbor Symposia on*  
640 *Quantitative Biology*, 79, 185–197. <http://doi.org/10.1101/sqb.2014.79.024893>
- 641 Fleming, S. M., Putten, E. J., & Daw, N. D. (2018). Neural mediators of changes of  
642 mind about perceptual decisions. *Nature Neuroscience*, 21(4), 617.  
643 <http://doi.org/10.1038/s41593-018-0104-6>
- 644 Freeman, W. J. (1979). Nonlinear gain mediating cortical stimulus-response  
645 relations. *Biological Cybernetics*, 33(4), 237–247.  
646 <http://doi.org/10.1007/BF00337412>
- 647 Gold, J. I., & Shadlen, M. N. (2007). The neural basis of decision making. *Annual*  
648 *Review of Neuroscience*, 30, 535–574.  
649 <http://doi.org/10.1146/annurev.neuro.29.051605.113038>
- 650 Green, D. M., & Swets, J. A. (1966). Signal detection theory and psychophysics.  
651 *Society*, 1, 521.
- 652 Hassler, U., Trujillo-Barreto, N., & Gruber, T. (2011). Induced gamma band  
653 responses in human EEG after the control of miniature saccadic artifacts.  
654 *NeuroImage*, 57(4), 1411–1421. <http://doi.org/10.1016/j.neuroimage.2011.05.062>
- 655 Hipp, J. F., & Siegel, M. (2013). Dissociating neuronal gamma-band activity from  
656 cranial and ocular muscle activity in EEG. *Frontiers in Human Neuroscience*, 7,  
657 338. <http://doi.org/10.3389/fnhum.2013.00338>
- 658 Iemi, L., & Busch, N. A. (2017). Moment-to-moment fluctuations in neuronal  
659 excitability bias subjective perception rather than decision-making. *bioRxiv*,  
660 151324. <http://doi.org/10.1101/151324>
- 661 Iemi, L., Chaumon, M., Crouzet, S. M., & Busch, N. A. (2017). Spontaneous Neural  
662 Oscillations Bias Perception by Modulating Baseline Excitability. *The Journal of*  
663 *Neuroscience : the Official Journal of the Society for Neuroscience*, 37(4), 807–  
664 819. <http://doi.org/10.1523/JNEUROSCI.1432-16.2017>
- 665 Jensen, O., & Mazaheri, A. (2010). Shaping functional architecture by oscillatory  
666 alpha activity: gating by inhibition. *Frontiers in Human Neuroscience*, 4, 186.  
667 <http://doi.org/10.3389/fnhum.2010.00186>
- 668 Joshi, S., Li, Y., Kalwani, R. M., & Gold, J. I. (2015). Relationships between Pupil  
669 Diameter and Neuronal Activity in the Locus Coeruleus, Colliculi, and Cingulate  
670 Cortex. *Neuron*, 0(0), 221–234. <http://doi.org/10.1016/j.neuron.2015.11.028>
- 671 Kloosterman, N. A., Meindertsma, T., Hillebrand, A., van Dijk, B. W., Lamme, V. A.  
672 F., & Donner, T. H. (2015). Top-down modulation in human visual cortex predicts  
673 the stability of a perceptual illusion. *Journal of Neurophysiology*, 113(4), 1063–  
674 1076. <http://doi.org/10.1152/jn.00338.2014>
- 675 Limbach, K., & Corballis, P. M. (2016). Prestimulus alpha power influences response  
676 criterion in a detection task. *Psychophysiology*, 53(8), 1154–1164.  
677 <http://doi.org/10.1111/psyp.12666>
- 678 Maris, E., & Oostenveld, R. (2007). Nonparametric statistical testing of EEG-and  
679 MEG-data. *Journal of Neuroscience Methods*, 164(1), 177–190.  
680 <http://doi.org/10.1016/j.jneumeth.2007.03.024>
- 681 Mathewson, K. E., Gratton, G., Fabiani, M., Beck, D. M., & Ro, T. (2009). To See or  
682 Not to See: Prestimulus  $\alpha$  Phase Predicts Visual Awareness. *Journal of*

- 683 *Neuroscience*, 29(9), 2725–2732. <http://doi.org/10.1523/JNEUROSCI.3963->  
684 08.2009
- 685 McGinley, M. J., David, S. V., & McCormick, D. A. (2015). Cortical Membrane  
686 Potential Signature of Optimal States for Sensory Signal Detection. *Neuron*,  
687 87(1), 179–192. <http://doi.org/10.1016/j.neuron.2015.05.038>
- 688 Meindertsma, T., Kloosterman, N. A., Nolte, G., Engel, A. K., & Donner, T. H. (2017).  
689 Multiple Transient Signals in Human Visual Cortex Associated with an  
690 Elementary Decision. *Journal of Neuroscience*, 37(23), 5744–5757.  
691 <http://doi.org/10.1523/JNEUROSCI.3835-16.2017>
- 692 Melloni, L., Schwiedrzik, C. M., Wibral, M., Rodriguez, E., & Singer, W. (2009).  
693 Response to: Yuval-Greenberg et al., “Transient Induced Gamma-Band  
694 Response in EEG as a Manifestation of Miniature Saccades.” *Neuron* 58, 429-  
695 441. *Neuron*, 62(1), 8–10– author reply 10–12.  
696 <http://doi.org/10.1016/j.neuron.2009.04.002>
- 697 Michalareas, G., Vezoli, J., van Pelt, S., Schoffelen, J.-M., Kennedy, H., & Fries, P.  
698 (2016). Alpha-Beta and Gamma Rhythms Subserve Feedback and Feedforward  
699 Influences among Human Visual Cortical Areas. *Neuron*, 89(2), 384–397.  
700 <http://doi.org/10.1016/j.neuron.2015.12.018>
- 701 Mitra, P. P., & Pesaran, B. (1999). Analysis of Dynamic Brain Imaging Data.  
702 *Biophysical Journal*, 76(2), 691–708. <http://doi.org/10.1016/S0006->  
703 3495(99)77236-X
- 704 Mulder, M. J., Wagenmakers, E.-J., Ratcliff, R., Boekel, W., & Forstmann, B. U.  
705 (2012). Bias in the brain: a diffusion model analysis of prior probability and  
706 potential payoff. *The Journal of Neuroscience : the Official Journal of the Society*  
707 *for Neuroscience*, 32(7), 2335–2343. <http://doi.org/10.1523/JNEUROSCI.4156->  
708 11.2012
- 709 Neath, A. A., & Cavanaugh, J. E. (2012). The Bayesian information criterion:  
710 background, derivation, and applications. *Wiley Interdisciplinary Reviews:*  
711 *Computational Statistics*, 4(2), 199–203. <http://doi.org/10.1002/wics.199>
- 712 Ni, J., Wunderle, T., Lewis, C. M., Desimone, R., Diester, I., & Fries, P. (2016).  
713 Gamma-Rhythmic Gain Modulation. *Neuron*, 92(1), 240–251.  
714 <http://doi.org/10.1016/j.neuron.2016.09.003>
- 715 Norton, E. H., Fleming, S. M., Daw, N. D., & Landy, M. S. (2017). Suboptimal  
716 Criterion Learning in Static and Dynamic Environments. *PLoS Computational*  
717 *Biology*, 13(1), e1005304–28. <http://doi.org/10.1371/journal.pcbi.1005304>
- 718 Oostenveld, R., Fries, P., Maris, E., & Schoffelen, J.-M. (2011). FieldTrip: open  
719 source software for advanced analysis of MEG, EEG, and invasive  
720 electrophysiological data. *Computational Intelligence and Neuroscience*, 2011(1),  
721 1–9. <http://doi.org/10.1155/2011/156869>
- 722 Perrin, F., Pernier, J., Bertrand, O., & Echallier, J. F. (1989). Spherical splines for  
723 scalp potential and current density mapping. *Electroencephalography and*  
724 *Clinical Neurophysiology*, 72(2), 184–187. <http://doi.org/10.1016/0013->  
725 4694(89)90180-6
- 726 Peterson, E. J., & Voytek, B. (2017). Alpha oscillations control cortical gain by  
727 modulating excitatory-inhibitory background activity. *Biorxiv.org*  
728 . <http://doi.org/https://doi.org/10.1101/185074>

- 729 Pleskac, T. J., Cesario, J., & Johnson, D. J. (2017). How race affects evidence  
730 accumulation during the decision to shoot. *Psychonomic Bulletin & Review*,  
731 *18*(2), 1–30. <http://doi.org/10.3758/s13423-017-1369-6>
- 732 Popov, T., Kastner, S., & Jensen, O. (2017). FEF-Controlled Alpha Delay Activity  
733 Precedes Stimulus-Induced Gamma-Band Activity in Visual Cortex. *Journal of*  
734 *Neuroscience*, *37*(15), 4117–4127. [http://doi.org/10.1523/JNEUROSCI.3015-  
735 \*16.2017\*](http://doi.org/10.1523/JNEUROSCI.3015-16.2017)
- 736 Rajagovindan, & Ding, M. (2011). From prestimulus alpha oscillation to visual-  
737 evoked response: an inverted-U function and its attentional modulation. *Journal*  
738 *of Cognitive Neuroscience*, *23*(6), 1379–1394.  
739 <http://doi.org/10.1162/jocn.2010.21478>
- 740 Ratcliff, R., & McKoon, G. (2008). The Diffusion Decision Model: Theory and Data for  
741 Two-Choice Decision Tasks. *Neural Computation*, *20*(4), 873–922.  
742 <http://doi.org/10.1162/neco.2008.12-06-420>
- 743 Ratcliff, R., Huang-Pollock, C., & McKoon, G. (2016, August 15). Modeling Individual  
744 Differences in the Go/No-Go Task With a Diffusion Model. [http://doi.org/http://](http://doi.org/http://dx.doi.org/10.1037/dec0000065)  
745 [dx.doi.org/10.1037/dec0000065](http://dx.doi.org/10.1037/dec0000065)
- 746 Samaha, J., Lemi, L., & Postle, B. R. (2017). Prestimulus alpha-band power biases  
747 visual discrimination confidence, but not accuracy. *Consciousness and*  
748 *Cognition*. <http://doi.org/10.1016/j.concog.2017.02.005>
- 749 Servan-Schreiber, D., Printz, H., & Cohen, J. D. (1990). A network model of  
750 catecholamine effects: gain, signal-to-noise ratio, and behavior. *Science (New*  
751 *York, NY)*, *249*(4971), 892–895.
- 752 Tversky, A., & Kahneman, D. (1974). Judgment under Uncertainty: Heuristics and  
753 Biases. *Science (New York, NY)*, *185*(4157), 1124–1131.  
754 <http://doi.org/10.1126/science.185.4157.1124>
- 755 Urai, A. E., de Gee, J. W., & Donner, T. H. (2018). Choice history biases subsequent  
756 evidence accumulation. *bioRxiv*, 251595. <http://doi.org/10.1101/251595>
- 757 van Kerkoerle, T., Self, M. W., Dagnino, B., Gariel-Mathis, M.-A., Poort, J., van der  
758 Togt, C., & Roelfsema, P. R. (2014). Alpha and gamma oscillations characterize  
759 feedback and feedforward processing in monkey visual cortex. *Proceedings of*  
760 *the National Academy of Sciences of the United States of America*, *111*(40),  
761 14332–14341. <http://doi.org/10.1073/pnas.1402773111>
- 762 Werkle-Bergner, M., Grandy, T. H., Chicherio, C., Schmiedek, F., Lovden, M., &  
763 Lindenberger, U. (2014). Coordinated within-Trial Dynamics of Low-Frequency  
764 Neural Rhythms Controls Evidence Accumulation. *Journal of Neuroscience*,  
765 *34*(25), 8519–8528. <http://doi.org/10.1523/JNEUROSCI.3801-13.2014>
- 766 White, C. N., & Poldrack, R. A. (2014). Decomposing bias in different types of simple  
767 decisions. *Journal of Experimental Psychology Learning, Memory, and*  
768 *Cognition*, *40*(2), 385–398. <http://doi.org/10.1037/a0034851>
- 769 Wiecki, T. V., Sofer, I., & Frank, M. J. (2013). HDDM: Hierarchical Bayesian  
770 estimation of the Drift-Diffusion Model in Python. *Frontiers in Neuroinformatics*, *7*.  
771 <http://doi.org/10.3389/fninf.2013.00014>
- 772 Yuval-Greenberg, S., Tomer, O., Keren, A. S., Nelken, I., & Deouell, L. Y. (2008).  
773 Transient Induced Gamma-Band Response in EEG as a Manifestation of  
774 Miniature Saccades. *Neuron*, *58*(3), 429–441.  
775 <http://doi.org/10.1016/j.neuron.2008.03.027>

776 Zaehle, T., Rach, S., & Herrmann, C. S. (2010). Transcranial Alternating Current  
777 Stimulation Enhances Individual Alpha Activity in Human EEG. *PLoS ONE*,  
778 5(11), e13766. <http://doi.org/10.1371/journal.pone.0013766>  
779  
780

## 781 **Materials and Methods**

782 **Participants** Sixteen participants (eight female, mean age 24.1 years,  $\pm 1.64$ ) took  
783 part in the experiment, either for financial compensation or in partial fulfillment of first  
784 year course requirements. Each participant completed three experimental sessions on  
785 different days, each session lasting ca. 2 hours, including preparation and breaks. One  
786 participant completed only two sessions, yielding a total number of sessions across  
787 subjects of 47. Due to technical issues, for one session only data for the liberal  
788 condition was available. One participant was an author. All participants were included  
789 in the signal-detection-theoretical and drift diffusion modeling analyses (Figure 2). One  
790 participant was excluded from the stimulus-related and the prestimulus alpha analysis  
791 (Figures 3 and 4) due to excessive noise (EEG power spectrum opposite of  
792  $1/\text{frequency}$ ). One further participant was excluded from the alpha-versus-gamma  
793 power modulation (Figure 5) and gamma-versus-drift bias analyses (Figure 6)  
794 because the liberal-conservative difference in gamma power in this participant was  $>$   
795 3 standard deviations away from the other participants. All participants had normal or  
796 corrected-to-normal vision and were right handed. Participants provided written  
797 informed consent before the start of the experiment. All procedures were approved by  
798 the ethics committee of the University of Amsterdam.

799 **Stimuli** Stimuli consisted of a continuous semi-random rapid serial visual presentation  
800 (rsvp) of full screen texture patterns. The texture patterns consisted of line elements  
801 approx.  $0.07^\circ$  thick and  $0.4^\circ$  long in visual angle. Each texture in the rsvp was  
802 presented for 40 ms (i.e. stimulation frequency 25 Hz), and was oriented in one of four  
803 possible directions:  $0^\circ$ ,  $45^\circ$ ,  $90^\circ$  or  $135^\circ$ . Participants were instructed to fixate a red  
804 dot in the center of the screen. At random inter trial intervals (ITI's) sampled from a  
805 uniform distribution (ITI range 0.3–2.2 s), the rsvp contained a fixed sequence of 25  
806 texture patterns, which in total lasted one second. This fixed sequence consisted of  
807 four stimuli preceding a (non-)target stimulus (orientations of  $45^\circ$ ,  $90^\circ$ ,  $0^\circ$ ,  $90^\circ$

808 respectively) and twenty stimuli following the (non)-target (orientations of 0°, 90°, 0°,  
809 90°, 0°, 45°, 0°, 135°, 90°, 45°, 0°, 135°, 0°, 45°, 90°, 45°, 90°, 135°, 0°, 135°  
810 respectively) (Figure 2). The fifth texture pattern within the sequence (occurring from  
811 0.16 s after sequence onset) was either a target or a nontarget stimulus. Nontargets  
812 consisted of either a 45° or a 135° homogenous texture, whereas targets contained a  
813 central orientation-defined square of 2.42° visual angle, thereby consisting of both a  
814 45° and a 135° texture. 50% of all targets consisted of a 45° square and 50% of a 135°  
815 square. Of all trials, 75% contained a target and 25% a nontarget. Target and  
816 nontarget trials were presented in random order. To avoid specific influences on target  
817 stimulus visibility due to presentation of similarly or orthogonally oriented texture  
818 patterns temporally close in the cascade, no 45° and 135° oriented stimuli were  
819 presented directly before or after presentation of the target stimulus. All stimuli had an  
820 isoluminance of 72.2 cd/m<sup>2</sup>. Stimuli were created using MATLAB (The Mathworks,  
821 Inc., Natick, MA, USA) and presented using Presentation (Neurobehavioral systems,  
822 Inc., Albany, CA, USA).

823 **Experimental design** The participants' task was to detect targets and actively report  
824 them by pressing a button using their preferred hand. Targets occasionally went  
825 unreported, presumably due to constant forward and backward masking by the  
826 continuous cascade of stimuli and unpredictability of target timing (Fahrenfort, Scholte,  
827 & Lamme, 2007). The onset of the fixed order of texture patterns preceding and  
828 following (non-)target stimuli was neither signaled nor apparent.

829 At the beginning of the experiment, participants were informed they could earn  
830 a total bonus of EUR 30, on top of their regular pay or course credit. In two separate  
831 conditions within each session of testing, we encouraged participants to use either a  
832 conservative or a liberal bias for reporting targets using both aversive sounds as well  
833 as reducing their bonus after errors. In the conservative condition, participants were  
834 instructed to only press the button when they were relatively sure they had seen the  
835 target. The instruction on screen before block onset read as follows: "Try to detect as  
836 many targets as possible. Only press when you are relatively sure you just saw a  
837 target." To maximize effectiveness of this instruction, participants were told the bonus  
838 would be diminished by ten cents after a false alarm. During the experiment, a loud  
839 aversive sound was played after a false alarm to inform the participant about an error.



840 During the liberal condition, participants were instructed to miss as few targets as  
841 possible. The instruction on screen before block onset read as follows: “Try to detect  
842 as many targets as possible. If you sometimes press when there was nothing this is  
843 not so bad”. In this condition, the loud aversive sound was played twice in close  
844 succession whenever they failed to report a target, and three cents were subsequently  
845 deducted from their bonus. The difference in auditory feedback between both  
846 conditions was included to inform the participant about the type of error (miss or false  
847 alarm), in order to facilitate the desired bias in both conditions. After every block, the  
848 participant’s score (number of missed targets in the liberal condition and number of  
849 false alarms in the conservative condition) was displayed on the screen, as well as the  
850 remainder of the bonus. After completing the last session of the experiment, every  
851 participant was paid the full bonus as required by the ethical committee.

852 During a block, participants continuously monitored the screen and were free  
853 to respond by button press whenever they thought they saw a target. Each block  
854 contained 240 trials, of which 180 target and 60 nontarget trials. Participants  
855 performed six blocks per session. The task instruction was presented on the screen  
856 before the block started. The condition of the first block of a session was  
857 counterbalanced across participants. Prior to EEG recording in the first session,  
858 participants performed a 10-minute practice run of both conditions, in which visual  
859 feedback directly after a miss (liberal condition) or false alarm (conservative) informed  
860 participants about their mistake, allowing them to adjust their decision bias  
861 accordingly.

862 **Behavioral analysis** We calculated participants criterion  $c$  (Green & Swets, 1966)  
863 across the trials in each condition as follows:

$$864 \quad c = -\frac{1}{2} [Z(\text{Hit-rate}) + Z(\text{FA-rate})]$$

865 where  $Z(\dots)$  is the inverse standard normal distribution. Furthermore, we calculated  
866 objective sensitivity measure  $d'$  using:

867

$$868 \quad d' = Z(\text{Hit-rate}) - Z(\text{FA-rate})$$

869

870 as well as by subtracting hit and false alarm rates. Reaction times (RT's) were  
871 measured as the period between target onset and button press.

872 **Drift diffusion modeling of choice behavior** We fitted the drift diffusion model to our  
873 behavioural data for each subject individually, and separately for the liberal and  
874 conservative conditions. We fitted the model using a *G* square method based on  
875 quantile RT's (RT cutoff, 200 ms, for details, see Ratcliff et al. (2016)), using a modified  
876 version of the HDDM 0.6.0 package (Wiecki, Sofer, & Frank, 2013) (code will be made  
877 available). The RT distributions for 'yes' responses were represented by the 0.1, 0.3,  
878 0.5, 0.7 and 0.9 quantiles, and, along with the associated response proportions,  
879 contributed to *G* square. In addition, a single bin containing the number of 'no'  
880 responses contributed to *G* square. Fitting the model to RT distributions for 'yes' and  
881 'no' choices (termed 'stimulus coding' in Wiecki et al. (2013)), as opposed to the more  
882 common fits of correct and incorrect choice RT's (termed 'accuracy coding' in Wiecki  
883 et al. (2013)), allowed us to estimate parameters that could have induced biases in  
884 subjects' behavior.

885 Parameter recovery simulations showed that letting both the the starting point  
886 of the accumulation process and drift bias (an evidence-independent constant added  
887 to the drift toward one or the other bound) free to vary with experimental conditions is  
888 problematic for data with no explicit "no" responses (data not shown). Thus, to test  
889 whether shifts in drift bias or starting point underlied bias we fitted three separate  
890 models. In the first model ('fixed model'), we allowed only the following parameters to  
891 vary between the liberal and conservative condition: (i) the mean drift rate across trials;  
892 (ii) the separation between both decision bounds (i.e., response caution); and (iii) the  
893 non-decision time (sum of the latencies for sensory encoding and motor execution of  
894 the choice). Additionally, the bias parameters starting point and drift bias were fixed for  
895 the experimental conditions. The second model ('starting point model') was the same  
896 as the fixed model, except that we let the starting point of the accumulation process  
897 vary with experimental condition, whereas the drift bias was kept fixed for both  
898 conditions. The third model ('drift bias model') was the same as the fixed model, except  
899 that we let the drift bias vary with experimental condition, while the starting point was  
900 kept fixed for both conditions. We used Bayesian Information Criterion (BIC) to select  
901 the model which provided the best fit to the data (Neath & Cavanaugh, 2012). The BIC



902 compares models based on their maximized log-likelihood value, while penalizing  
903 for the number of parameters.

904 **EEG recording** Continuous EEG data were recorded at 256 Hz using a 48-channel  
905 BioSemi Active-Two system (Biosemi, Amsterdam, the Netherlands), connected to a  
906 standard EEG cap according to the international 10-20 system. Electrooculography  
907 (EOG) was recorded using two electrodes at the outer canthi of the left and right eyes  
908 and two electrodes placed above and below the right eye. Horizontal and vertical EOG  
909 electrodes were referenced against each other, two for horizontal and two for vertical  
910 eye movements (blinks). We used the Fieldtrip toolbox (Oostenveld, Fries, Maris, &  
911 Schoffelen, 2011) and custom software in MATLAB R2016b (The Mathworks Inc.,  
912 Natick, MA, USA) to process the data (see below). Data were re-referenced to the  
913 average voltage of two electrodes attached to the earlobes.

914 **Trial extraction and preprocessing** We extracted trials of variable duration from 1 s  
915 before target sequence onset until 1.25 after button press for trials that included a  
916 button press (hits and false alarms), and until 1.25 s after stimulus onset for trials  
917 without a button press (misses and correct rejects). The following constraints were  
918 used to classify (non-)targets as detected (hits and false alarms), while avoiding the  
919 occurrence of button presses in close succession to target reports and button presses  
920 occurring outside of trials: 1) A trial was marked as detected if a response occurred  
921 within 0.84 s after target onset; 2) when the onset of the next target stimulus sequence  
922 started before trial end, the trial was terminated at the next trial's onset; 3) when a  
923 button press occurred in the 1.5 s before trial onset, the trial was extracted from 1.5 s  
924 after this button press; 4) when a button press occurred between 0.5 s before until 0.2  
925 s after sequence onset, the trial was discarded. See Kloosterman et al. (2015) and  
926 Meindertsma et al. (2017) for similar trial extraction procedures. After trial extraction,  
927 channel time courses were linearly detrended and the mean of every channel was  
928 removed per trial.

929 **Artifact rejection** Trials containing muscle artifacts were rejected from further  
930 analysis using a standard semi-automatic preprocessing method in Fieldtrip. This  
931 procedure consists of bandpass-filtering the trials of a condition block in the 110–125  
932 Hz frequency range, which typically contains most of the muscle artifact activity,

933 followed by a Z-transformation. Trials exceeding a threshold Z-score were removed  
934 completely from analysis. We used as the threshold the absolute value of the minimum  
935 Z-score within the block, + 1. To remove eye blink artifacts from the time courses, the  
936 EEG data from a complete session were transformed using independent component  
937 analysis (ICA), and components (typically one or two of the 48) due to blinks was  
938 removed from the data. In addition, to remove microsaccade-related artifacts we  
939 included two virtual channels in the ICA based on channels Fp1 and Fp2, which  
940 included transient spike potentials as identified using the algorithm from Hassler et al.  
941 (2011). The two components loading high on these virtual electrodes (typically with a  
942 frontal topography) were also removed. Blinks and eye movements were then semi-  
943 automatically detected from the horizontal and vertical EOG (frequency range 1–15  
944 Hz; z-value cut-off 4 for vertical; 6 for horizontal) and trials containing eye artefacts  
945 within 0.1 s around target onset were discarded. This step was done to remove trials  
946 in which the target was not seen because the eyes were closed. Finally, trials  
947 exceeding a threshold voltage range of 200  $\mu$ V were discarded. To attenuate volume  
948 conduction effects and suppress any remaining microsaccade-related activity, the  
949 scalp current density (SCD) was computed using the second-order derivative (the  
950 surface Laplacian) of the EEG potential distribution (Perrin et al., 1989).

951 **Spectral analysis of EEG power** We used a sliding window Fourier transform ((Mitra  
952 & Pesaran, 1999); step size, 50 ms; window length, 400 ms; frequency resolution, 2.5  
953 Hz) to calculate time-frequency representations (spectrograms) of the EEG power for  
954 each electrode and each trial. We used a single Hann taper for the frequency range  
955 of 3–35 Hz (spectral smoothing, 4.5 Hz, bin size, 1 Hz) and the multitaper technique  
956 for the 36 – 100 Hz frequency range (spectral smoothing, 8 Hz; bin size, 2 Hz; five  
957 tapers). See Kloosterman et al. (2015) and Meindertsma et al. (2017) for similar  
958 settings.

959 Spectrograms were aligned to the onset of the stimulus sequence containing  
960 the (non)target. Power modulations (denoted as M in Figure 3) during the trials were  
961 quantified as the percentage of power change at a given time point and frequency bin,  
962 relative to a baseline power value for each frequency bin. We used as a baseline the  
963 mean EEG power in the interval 0.4 to 0 s before trial onset. If this interval was not  
964 completely present in the trial due to preceding events (see Trial extraction), this

965 period was shortened accordingly. We subtracted the trial-specific baseline value from  
966 each sample in the time course per frequency bin and divided by the mean baseline  
967 power across all trials within a session. For the analysis of raw prestimulus power  
968 modulations no baseline correction was applied. We focused our analysis of EEG  
969 power modulations around target onsets on those electrodes that processed the visual  
970 stimulus. To this end, we averaged the power modulations or raw power across eleven  
971 occipito-parietal electrodes that showed stimulus-induced responses in the gamma-  
972 band range (59–100 Hz). See Kloosterman et al. (2015) and Meindertsma et al. (2017)  
973 for a similar procedure.

974 **Condition-related EEG power modulation** To test at which frequencies raw EEG  
975 power differed for the liberal and conservative conditions, we averaged power  
976 modulation from 0.8 s up to 0.2 s (i.e. up to half the window size used for spectral  
977 analysis, to avoid contamination of post- with pre-stimulus activity (Iemi et al., 2017))  
978 from trial onset. Then, we expressed the power at each frequency in units of percent  
979 signal change with respect to the conservative condition and statistically tested  
980 whether this signal differed from zero (Figure 4C) (see Statistical comparisons).

981 **Response gain model test** To test the prediction of increased gain during liberal of  
982 the gain model, we first averaged activity in the 8–12 Hz range from 0.8 to 0.2 s before  
983 trial onset (staying half our window size from trial onset, to avoid mixing pre- and post-  
984 stimulus activity, also see Iemi et al. (2017)) and took the log transform, yielding a  
985 single scalar alpha power value per trial expressing neural excitability. If this interval  
986 was not completely present in the trial due to preceding events (see Trial extraction),  
987 this period was shortened accordingly. Trials in which the scalar was  $> 3$  standard  
988 deviations away from the participant's mean were excluded. We then sorted all single  
989 trials for each participant in ascending order of excitability and assigned them to ten  
990 equally-spaced bins ranging from the lowest to the highest excitability scalars of that  
991 participant. Adjacent bin ranges overlapped for 50% to stabilize estimates. Then we  
992 averaged the corresponding log-transformed gamma modulation of these trials  
993 (consisting of the average power within 59–100 Hz 0.2 to 0.6 s after trial onset) and  
994 normalized each participants response by subtracting the minimum gamma power  
995 during the conservative condition from all bins. Finally, we averaged across  
996 participants and plotted the excitability bin number against the normalized gamma

997 power for each condition. See Rajagovindan and Ding (2011) for a similar procedure.  
998 To statistically test the gain prediction, we employed a three-way repeated measures  
999 ANOVA (see Statistical comparisons). For plotting purposes (Figure 5C), we  
1000 computed within-subject error bars by removing within each participant the mean  
1001 across conditions from the estimates.

1002 **Correlation between gamma power and drift bias** To link DDM drift bias and cortical  
1003 gamma power, we re-fitted the DDM drift bias model while freeing the drift bias  
1004 parameter within each condition for the ten neural excitability bins as determined by  
1005 prestimulus alpha suppression (see section Response gain model test), while freeing  
1006 the other parameters (drift rate, boundary separation, non-decision time) for each  
1007 condition and fixing starting point across conditions. Then, we normalized the obtained  
1008 scalars for gamma power and drift bias separately within participants using a Z-  
1009 transformation, and averaged across participants. Finally, we used within-subject  
1010 group regression of the two measures across the ten bins for both conditions  
1011 separately. In a control analysis, we conducted this regression after taking the liberal  
1012 – conservative difference for each excitability bin before regressing, and obtained  
1013 convergent results (Figure S4).

1014 **Statistical comparisons** We used two-sided permutation tests (10,000 permutations)  
1015 (Efron & Tibshirani, 1998) to test the significance of behavioral effects and the model  
1016 fits. To quantify power modulations after (non-)target onset, we tested the overall  
1017 power modulation for significant deviations from zero. For these tests, we used a  
1018 cluster-based permutation procedure to correct for multiple comparisons (Maris &  
1019 Oostenveld, 2007). For time-frequency representations of power modulation, this  
1020 procedure was conducted across all time-frequency bins. For frequency spectra, this  
1021 procedure was performed across all frequency bins. To test whether there was  
1022 evidence for increased gain in the liberal compared to the conservative condition, we  
1023 conducted a three-way repeated measures ANOVA (condition (conservative, liberal)  
1024 x brain activity type (prestimulus alpha, poststimulus gamma power) x bin level (1–  
1025 10)) using SPSS 23 (IBM, Inc.), inspecting linear and quadratic contrasts. As sphericity  
1026 was violated in this model ( $p = 0.0001$ ), we report both the uncorrected and  
1027 Greenhouse-Geisser-corrected p-values. We used Pearson correlation to test the link  
1028 between gamma power and drift bias. We tested the difference in correlation between

1029 the liberal and conservative conditions using the Fisher r-to-Z transformation and  
1030 obtained the corresponding two-tailed p-value.  
1031

1032

## Supplemental Information

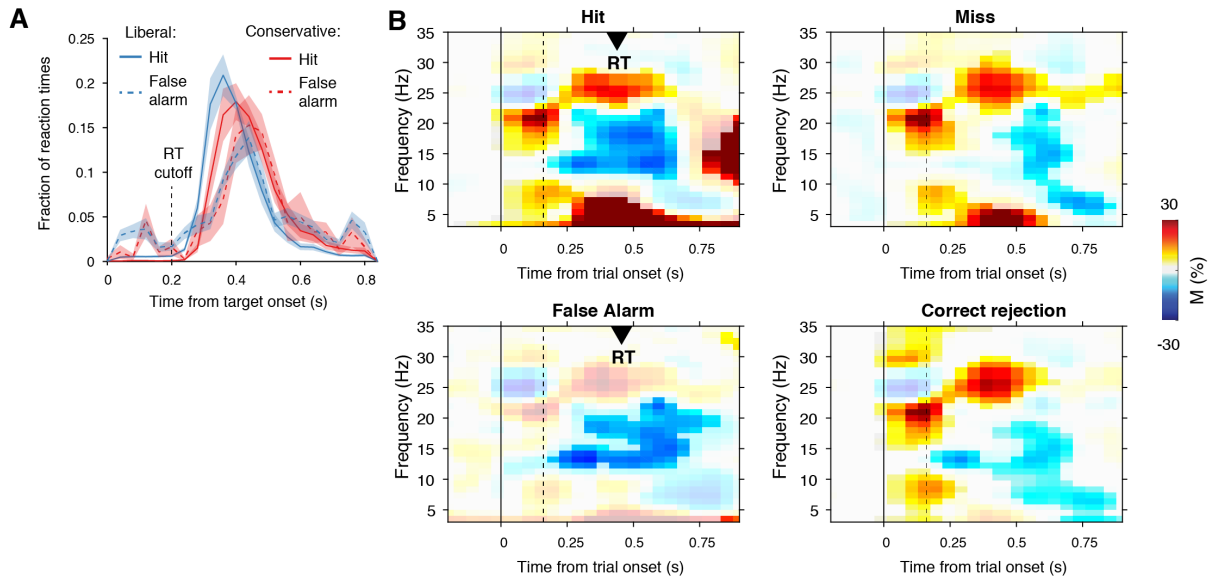

1033

1034 **Figure S1 | Behavioral and neurophysiological evidence that participants were sensitive to the**  
1035 **implicit task structure. A.** Participant-average RT distributions for hits and false alarms in both  
1036 conditions. The presence of similar RT distributions for false alarms and hits indicates that participants  
1037 were sensitive to trial onset despite the fact that trial onsets were only implicitly signalled. Error bars,  
1038 SEM. **B.** Time-frequency representations of low-frequency EEG power modulations with respect to the  
1039 prestimulus period ( $-0.4 - 0$  s), pooled across the two conditions. Significant low-frequency modulation  
1040 occurred even for nontarget trials without overt response (correct rejections), indicating that participants  
1041 detected the onset of a trial even when neither a target was presented nor a response was given.  
1042 Saturated colors indicate clusters of significant modulation, cluster threshold  $p < 0.05$ , two-sided  
1043 permutation test across participants, cluster-corrected;  $N = 15$ ). Solid and dotted vertical lines  
1044 respectively indicate the onset of the trial and the target stimulus. M, power modulation.

1045

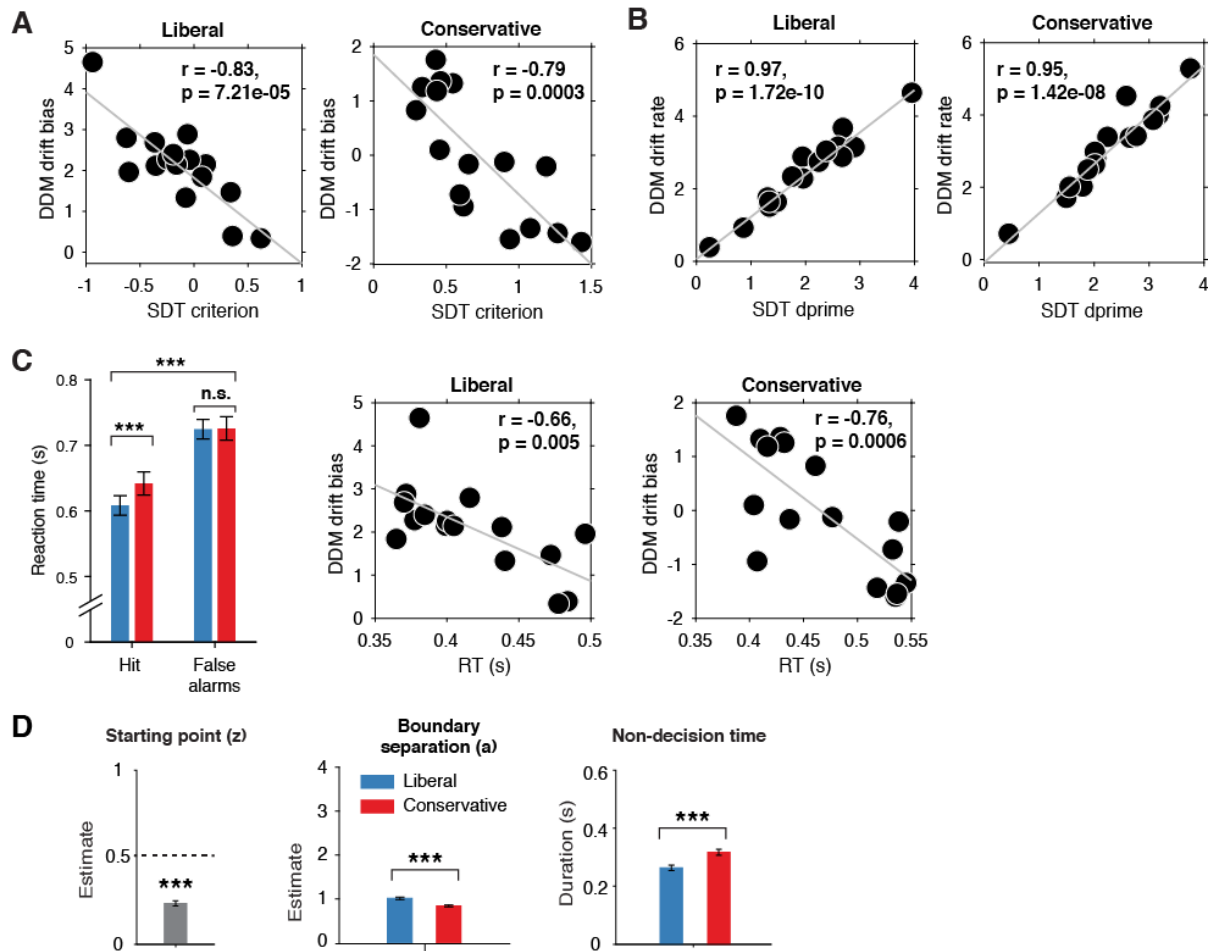

1046

1047 **Figure S2 | Signal-detection-theoretic (SDT) behavioral measures during both conditions**  
 1048 **correspond closely to drift diffusion modeling (DDM) parameters. A.** Across-participant Pearson  
 1049 correlation between criterion and DDM drift bias for the two conditions. The correlation is negative due  
 1050 to a lower criterion reflecting a stronger liberal bias. Each dot represents a participant. **B.** As A. but for  
 1051 correlation between dprime and drift rate. **C.** Left panel, mean reaction times (RT) for hits and false  
 1052 alarms for the two conditions. Middle and right panels, As A. but for correlation between RT and drift  
 1053 bias. **D.** Parameter estimates in the drift bias DDM not related to evidence accumulation (drift).  $***p <$   
 1054  $0.001$ ; n.s., not significant.



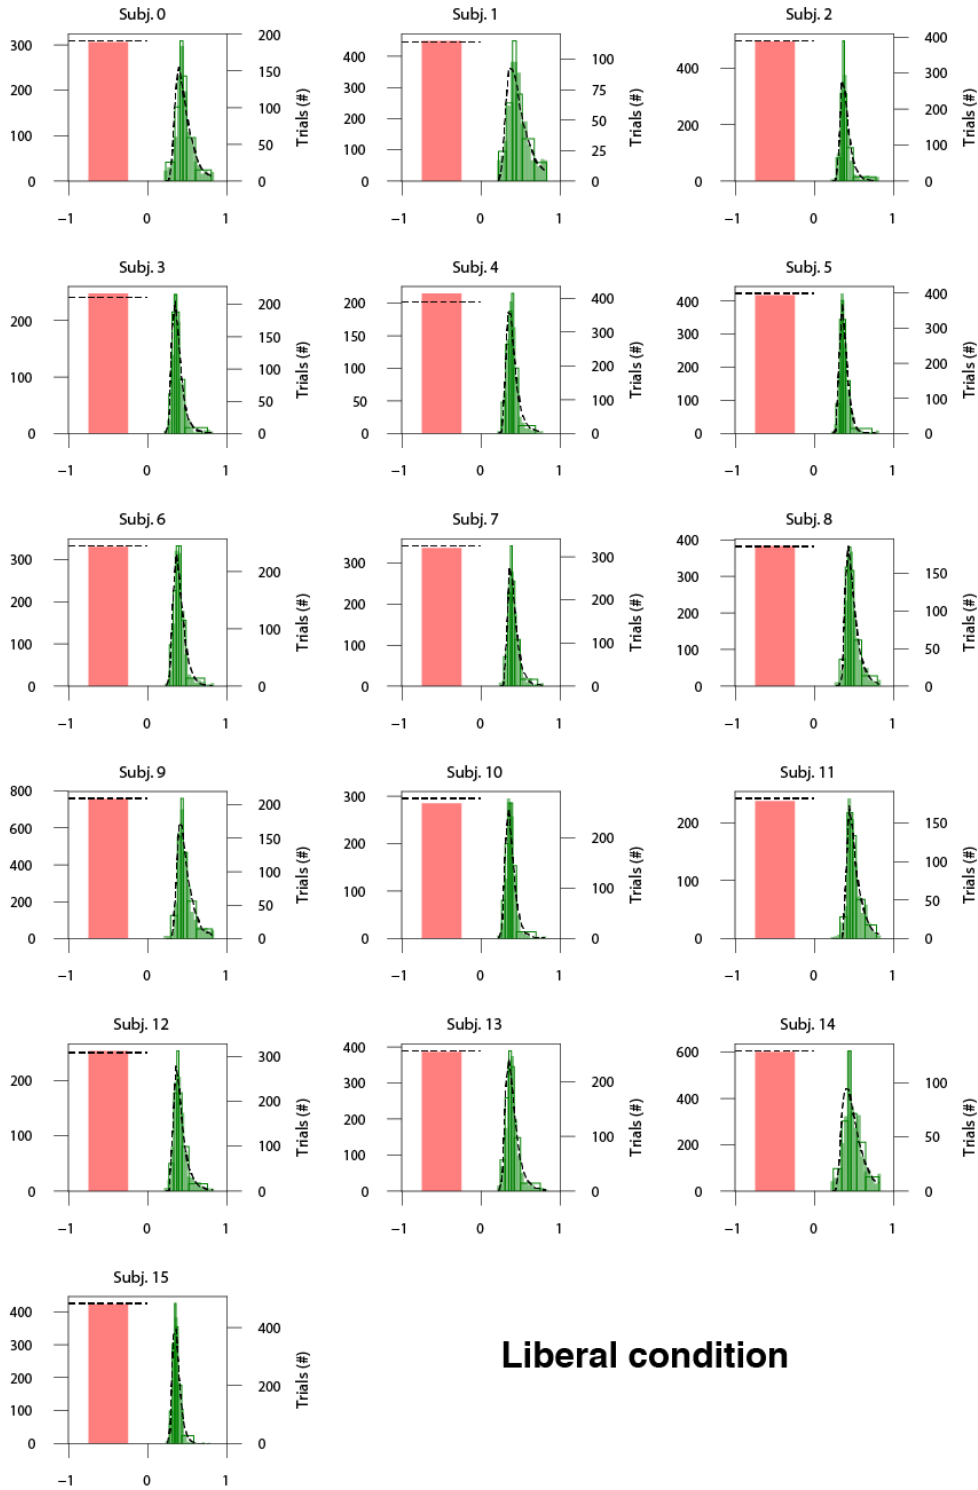

**Liberal condition**

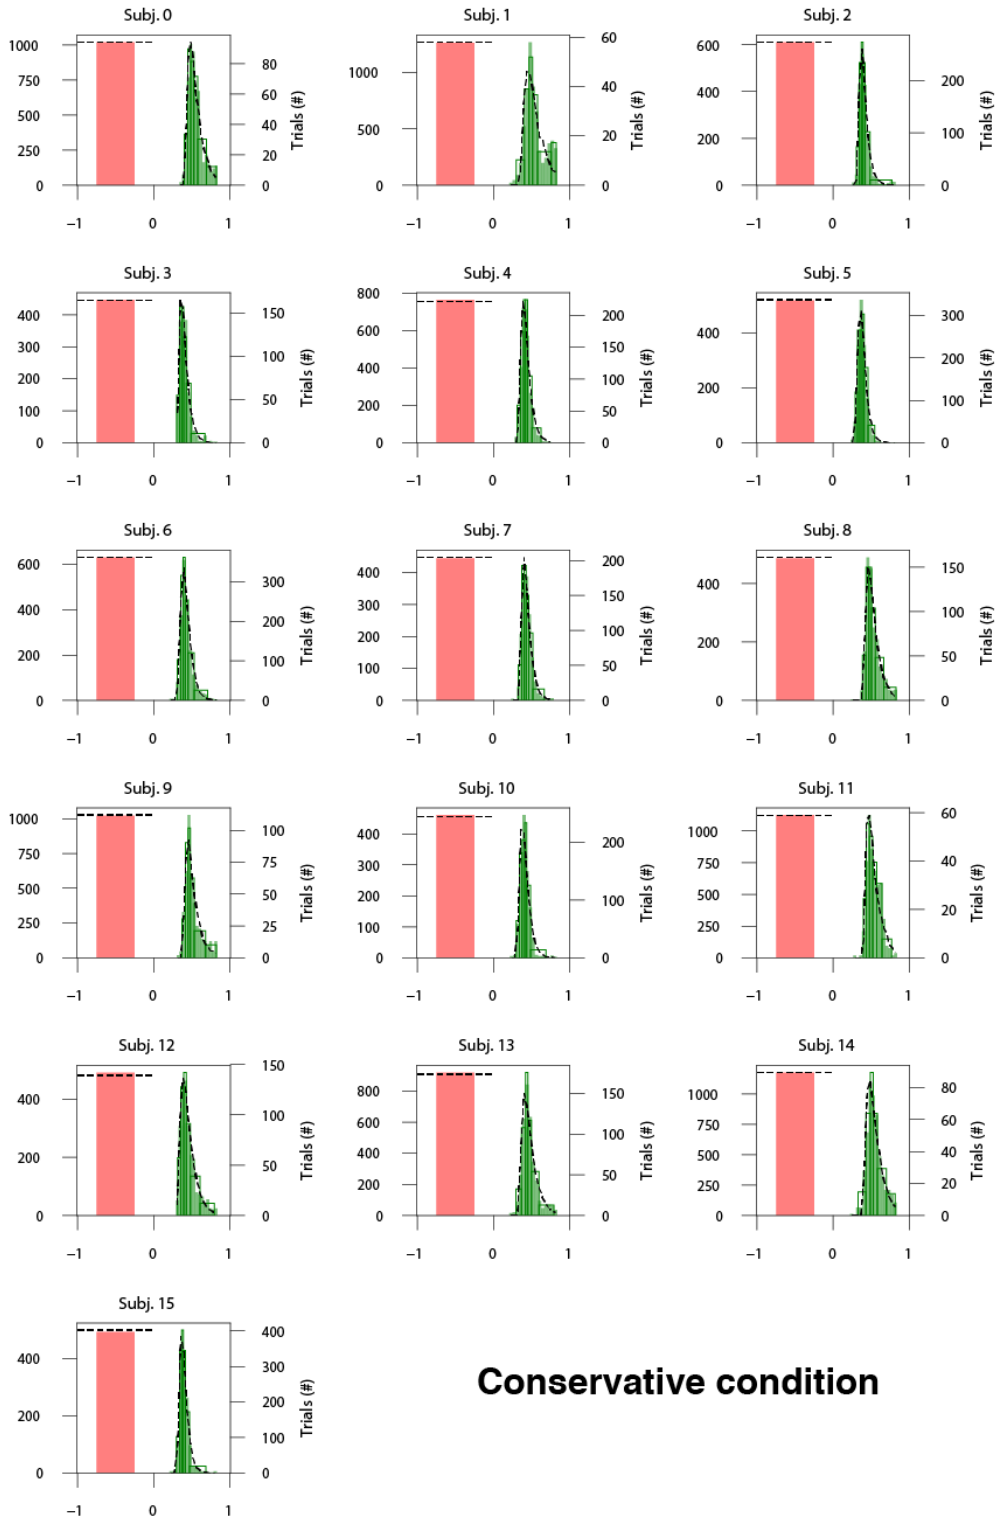

1056

1057 **Figure S3 | Single-participant drift diffusion model fits for the drift bias model for both conditions**

1058 Pink bars, number of “No” trials; Green bars, RT quantiles for “Yes” trials; dotted lines, model fits for  
1059 the drift bias model.

1060

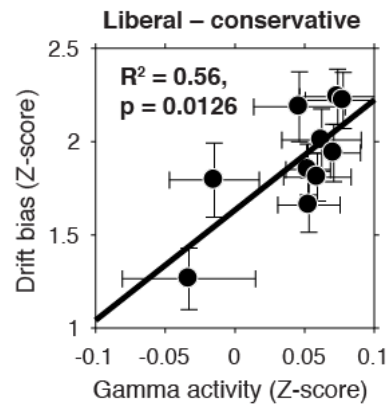

1061

1062 **Figure S4 | Liberal – conservative gamma activity predicts corresponding drift bias increase,**  
1063 **showing that the experimental bias manipulation enhanced gamma activity. A.** Linear regression  
1064 of drift bias on gamma power across excitability bins for the liberal – conservative contrast. Gamma  
1065 and drift bias values were computed within participant within ten alpha suppression bins reflecting  
1066 neural excitability, then Z-scored, and finally the conservative – liberal difference across bins was taken.
